1 **Complete representation of action space and value in all striatal**  
2 **pathways.**

3

4 **Moritz Weglage<sup>1</sup>, Emil Wärnberg<sup>1</sup>, Iakovos Lazaridis<sup>1</sup>, Ourania Tzortzi,**  
5 **Konstantinos Meletis\***

6 Department of Neuroscience, Karolinska Institutet, Stockholm, 171 77, Sweden.

7

8

9 \*Corresponding Author: [dinos.meletis@ki.se](mailto:dinos.meletis@ki.se)

10 <sup>1</sup>Contributed equally

11

12

13 **ABSTRACT**

14 The dorsal striatum plays a central role in motor and decision programs, such as the selection  
15 and execution of particular actions and the evaluation of their outcomes. A standard model  
16 has emerged where distinct output pathways encode separate motor-action signals, including  
17 selection-evaluation division in the matrix versus patch compartments. We used large-scale  
18 cell-type specific calcium imaging during motor and decision behaviors to determine and  
19 contrast the activity of individual striatal projection neurons (SPNs) belonging to one of the  
20 three major output pathways in the dorsomedial striatum – patch Oprm1+ SPNs versus the  
21 D1+ direct and A2A+ indirect pathway. We found that Oprm1+ SPNs were tuned to a number  
22 of different behavioral categories, such as to different movements, or to discrete actions and  
23 decisions in a two-choice task, and these complex representations were found to the same  
24 extent in all three striatal output pathways. The sharp tuning of individual SPNs was highly  
25 stereotyped over time while performing a specific task, but the tuning profile remapped  
26 between different behavioral contexts. In addition to action representations, SPNs showed  
27 pathway-independent representation of decision-variables such as the trial strategy and the  
28 action value. We propose that all three major output pathways in the dorsomedial striatum  
29 share a similarly complete representation of the entire action space, including task- and  
30 phase-specific signals of action value and choice.

31

## 32 INTRODUCTION

33 The selection of specific actions is based on computations that produce prediction and  
34 evaluation of the action outcome, and proper action selection in each situation, is essential  
35 for the survival of all species. Action selection computations have been associated with  
36 neuron activity in basal ganglia circuits, where the striatum plays a central role in integrating  
37 information from cortical and subcortical circuits, which is then propagated to downstream  
38 targets for action execution (Cox and Witten, 2019; Gurney et al., 2001; Hikosaka et al.,  
39 2014). The striatum has been neuroanatomically divided into two major output pathways: the  
40 direct pathway targeting the globus pallidus interna (GPi) and the substantia nigra (SN), and  
41 the indirect pathway targeting the globus pallidus externa (GPe) (Kreitzer, 2009; Tepper et  
42 al., 2007). A circuit model has emerged based on the dichotomous organization of the  
43 striatum, where the direct and indirect pathway differentially control motor programs and  
44 explain the pathophysiology of movement disorders (Albin et al., 1989; Alexander and  
45 Crutcher, 1990; Nelson and Kreitzer, 2014). In this model, the striatal pathways regulate  
46 motor behaviors through antagonistic signals. The striatum has been shown to also encode  
47 key variables in decision-making such as action value (Lau and Glimcher, 2008; Samejima  
48 et al., 2005; Wang et al., 2013). In addition to the direct and indirect pathway, the striatum  
49 can be divided into compartments using neurochemical definitions (Graybiel and Ragsdale,  
50 1978; Olson et al., 1972), notably the patch (also known as striosome) and matrix  
51 compartments, where the striatal patches exhibit high levels of mu opioid receptor (MOR)  
52 expression (Märting et al., 2019; Pert et al., 1976). The striatal patches form a distinct pathway  
53 that projects to the GPi and SN (Fujiyama et al., 2011; Jiménez-Castellanos and Graybiel,  
54 1989), and the function of patches has been primarily linked to the evaluation of actions  
55 (Friedman et al., 2015; White and Hiroi, 1998).

56 Distinct gene expression patterns have been used to genetically target, visualize, and  
57 manipulate the direct, indirect, and patch pathway (Gerfen and Surmeier, 2011; Gerfen et al.,  
58 1990; Gong et al., 2003). In support of a circuit model emphasizing the opposing function of  
59 the direct and indirect pathways, optogenetic manipulation has shown their differential role in  
60 reinforcement as well as action (Geddes et al., 2018; Kravitz et al., 2012; Tai et al., 2012). In  
61 contrast, concomitant activation of both direct and indirect pathways during movements  
62 suggests a possibly mixed motor representation (Cui et al., 2013), and the direct and indirect  
63 pathways show complementary roles in action sequences (Tecuapetla et al., 2016). Imaging  
64 of neuron activity in the direct and indirect pathway (Klaus et al., 2017), in striatal patches  
65 (Bloem et al., 2017; Yoshizawa et al., 2018), and in mouse models of movement disorders

66 (Parker et al., 2018), has together provided some supporting evidence for the opposing role  
67 of striatal pathways for simple motor and action behaviors, but has also challenged the unitary  
68 representation of behavioral events.

69 To address the role of the striatal patches as well as the other two major output pathways of  
70 the dorsomedial striatum in the representation of motion, actions, and decision-making  
71 variables, we recorded the activity of single SPNs belonging to the patch (Oprm1+) pathway  
72 as well as the direct (D1+) and indirect (A2A+) pathway using transgenic mice performing  
73 specific behaviors. Our findings on the activity of Oprm1+ SPNs during locomotion versus  
74 decision-making reveal a context or task-specific encoding of the discrete movements during  
75 exploration, the discrete actions and task strategy (action space and value) in a two-choice  
76 task, that form a complete representation of the action space and value that is shared with  
77 the major direct and indirect striatal output pathways.

78

## 79 RESULTS

### 80 The activity of dorsomedial D1+, A2A+, and Oprm1+ SPNs during locomotion.

81 To define the role of the patch Oprm1+ SPNs during locomotion versus action selection and  
82 evaluation and to compare with the two other major output pathways of the dorsal striatum,  
83 we imaged the genetically-encoded calcium sensor GCaMP6s in SPNs through implanted  
84 GRIN lenses targeting the anterior part of the dorsomedial striatum in the right hemisphere  
85 of freely moving mice (Fig. 1A and Fig. S1). To map the activity of Oprm1+ SPNs, we used  
86 an Oprm1-Cre mouse line that specifically labels Oprm1+ cells (Märting et al., 2019). We  
87 imaged the calcium signal in individual SPNs belonging to the three major output pathways,  
88 defined genetically by the expression of D1 (i.e. D1-Cre for direct pathway), A2A (i.e. A2A-  
89 Cre for indirect pathway), or Oprm1 (i.e. Oprm1-Cre for patches) (Fig. 1B). We applied the  
90 CNMF-E algorithm to extract regions-of-interest (ROIs) and deconvolved the calcium traces  
91 for single neurons (Giovannucci et al., 2019) to better capture the physiological range  
92 dynamics of the neuron activity (Fig. 1C).

93 To first map the activity of individual SPNs during basic motor programs, we exposed mice  
94 to an open field arena and recorded the activity of SPNs during exploration and self-paced  
95 locomotion. We found on the population level that the Oprm1+ pathway as well as the D1+  
96 and A2a+ pathway showed on average a bias for encoding contralateral turns, and an  
97 increase in activity upon movement initiation and a decrease after stopping (Fig. 1D-E and  
98 Fig. S2). To map in more detail the SPN activity during specific behavioral events, such as  
99 turning, acceleration, start-stop, we extracted a set of discrete behaviors in the open field  
100 arena (e.g. left turn, right turn), and plotted first the activity of selected Oprm1+ SPNs to map  
101 their tuned responses. We found many examples of Oprm1+ SPNs that showed  
102 representation of simple movement categories, such as left versus right turning or forward  
103 acceleration (Fig. 1F-H and Fig. S2). To directly compare the activity features for SPNs  
104 belonging to the three output pathways, we computed tuning scores for the main behavioral  
105 categories for all recorded SPNs. The distribution of tunings was unimodal for all behavioral  
106 categories, but wider than expected by chance (Fig. S2). Based on these distributions, we  
107 defined the significantly tuned neurons (Fig. 1I-J). Overall, we found significantly tuned  
108 neurons that represented for example left turns (contralateral to the recording side) or running  
109 speed. Importantly, we found a surprising similarity between the D1+, A2A+, as well as  
110 Oprm1+ pathways in term of the proportion of tuned neurons for each of the different  
111 behavioral categories as well as in the dynamics of the event-related calcium signal (Fig. 1K-  
112 L, Fig. S2). Similar to a previous study on the activity of D1+ and D2+ SPNs in dorsolateral

113 striatum during locomotion(Klaus et al., 2017), we found that neurons of a specific tuning type  
114 were slightly closer in space than expected by chance for all three pathways but they did not  
115 form clear spatial clusters (Fig. 1M-N). To further assess to what extent the recorded neuron  
116 activity in each striatal pathway contained information to encode the different behavioral  
117 categories in the open field, we trained support-vector machines (SVMs) on the neuron  
118 activity data in order to decode the different behaviors. We found high decoding accuracy for  
119 the mouse behavior using neuron activity data from SPNs belonging to either the D1+, A2A+,  
120 or the Oprm1+ pathway, and decoding was not significantly different for data from the three  
121 pathways (Fig. 1O-P and Fig. S7B). This supports that Oprm1+ SPNs in dorsomedial striatum  
122 can encode the various parameters of the motor program, and that the three major striatal  
123 output pathways all contain a similarly complete representation of the different behavioral  
124 categories, formed by the wide range of tuning profiles of individual SPNs found in each of  
125 the direct, indirect, and patch pathway.

126  
127 **The D1+, A2A+, and Oprm1+ SPNs represent the action space of a two-alternative**  
128 **choice task.**

129 Since striatal patches have been proposed to primarily guide reward-based behavior and the  
130 evaluation of actions, we investigated the tuning profile of SPNs in a behavioral context of  
131 decision-making and action value. We imaged SPN activity in a behavioral task that requires  
132 evaluation of actions and updating of predictions regarding action outcome, based on a  
133 modified two-alternative choice task (Tai et al., 2012). In this task, mice were trained to freely  
134 initiate a trial by nose-poking into a center port, which allowed them to then choose to nose-  
135 poke on the right or left side port to receive a liquid reward (Fig. 2A). The probability of reward  
136 delivery in the one of the side ports (i.e. the correct port) was set to 75%. After a reward was  
137 delivered, there was a 5% chance that the reward port switched side. Importantly, mice were  
138 not given any cue to indicate the rewarded port, forcing them to keep track of their actions  
139 and update their choices based on recent trial outcome history. We trained mice in the task  
140 for at least 3 weeks, resulting in correct port choice in 67% of the trials, indicating that the  
141 mice learned to dynamically adapt their choices to trial outcome (Fig. 2B-C). Mice showed  
142 appropriate switching behavior, by updating their choice based on the reward history,  
143 showing a win-stay (Fig. 2D) and lose-switch strategy (Fig. 2E).

144 To define whether neuron activity reflected the strategy employed in the different trial types,  
145 we first focused our analysis on win-stay trials (e.g. reward in the right port followed by choice  
146 for the right port) versus lose-switch trials (e.g. no reward in the right port followed by choice  
147 for the left port) (Fig. 2F). We plotted the activity of individual SPNs from D1+, A2A+, and

148 Oprm1+ pathways in the five discrete phases of the win-stay trial. We found that the peak  
149 activity of all recorded neurons across all win-stay trials tiled the entire task structure,  
150 suggesting that SPN activity did not show a clear bias or structure towards certain phases of  
151 the trial regardless of pathway identity (Fig. 2G).

152 To further explore the relation between neuron activity, trial structure and behavioral strategy,  
153 we pooled single-trial recording data of all trials following a right choice from several recording  
154 sessions to construct one pseudosession, which comprised approximately 20-30  
155 pseudotrials of each trial type. We then analyzed the single-pseudotrial activity data by  
156 performing a dimensionality reduction to extract task-relevant principal components (principal  
157 component analysis, PCA), and we found that neuron activity contained structured  
158 information to describe the entire task trajectory, but also to discriminate the trial type (win-  
159 stay, lose-stay, lose-switch; Fig. 2H). The neuron activity therefore encodes two critical  
160 aspects for proper task performance: the sequential representation of phases in the trial as  
161 well as the decision variables differentiating the main trial type strategies.

162

### 163 **The D1+, A2A+, and Oprm1+ SPNs share a similar representation of the trial phases.**

164 The widely distributed activities of SPNs over many trial phases lead us to investigate the  
165 SPN activity during the different phases of the trial, and we focused on how individual neurons  
166 in the D1+, A2A+, and Oprm1+ pathways were modulated by discrete trial phases. We found  
167 that some Oprm1+ neurons were highly tuned to discrete phases in the task, representing  
168 specific movements (e.g. center to right turns) as well as outcome and choice signals (Fig.  
169 3A-B). Furthermore, we found examples of Oprm1+ SPNs with sharp tuning for all the other  
170 trial phases (Fig. S3). To investigate and compare the tuning profile of all the striatal  
171 pathways, we calculated tuning scores for neurons in each output pathway for all twelve  
172 discrete task phases (Fig. 3C-D and Fig. S4). We found that D1+, A2A+, and Oprm1+  
173 pathways showed a similar proportion of tuned neurons for each trial phase, and that all  
174 pathways showed a tuning bias for trial phases representing contralateral movements (Fig.  
175 3E). We selected the significantly tuned neurons for the four different movements in the task  
176 and visualized their average activity during each phase. We found that the average amplitude  
177 was similar and phase-specific for all pathways (Fig. 3F). SPNs tuned to the reward phase  
178 were not modulated by reward magnitude (Fig. S5). Importantly, the tuning of single neurons  
179 was often not limited to a single trial phase, and the tuning profiles did not form well-separated  
180 clusters, suggesting a rich representation of the trial (Fig. 3G and Fig. S6). We calculated the  
181 spatial organization of neurons that share a significant tuning and found that these neurons



182 were closer than expected by chance but did not form distinct clusters, further supporting the  
183 absence of clear functional segregation of SPNs in space (Fig. 3H-I).  
184 The rich tuning profile found in the D1+, A2A+, and Oprm1+ pathways suggested that neuron  
185 activity should include enough information to categorize the trial phase on a single trial basis.  
186 To test this, we trained SVMs to predict trial phases based exclusively on the neuron activity.  
187 We found that activity from even a relatively small fraction of the neurons was sufficient to  
188 decode any of the twelve task phases with high accuracy, and that the decoding accuracy  
189 was similar for neuron activity from the D1+, A2A+, and Oprm1+ pathways (Fig. 3J-K and  
190 Fig. S7). The high accuracy of these predictions demonstrates that all three pathways form  
191 trial or action space representations that are conserved on a trial-by-trial basis. Furthermore,  
192 we found clear examples where the peak neuron activity tiled the subparts of a single phase,  
193 exemplified by the peak activity of Oprm1+ SPNs during a right port to center port turn, which  
194 suggested that SPN activity contained information on the phase substructure in a trial (Fig.  
195 3L). To determine whether neuron activity could represent the detailed temporal organization  
196 of phase progression, we trained SVMs on the activity of D1+, A2A+, and Oprm1+ pathways  
197 and found that we could accurately predict the temporal substructure of the turning behavior  
198 (right-center port turn) over the entire phase for all three pathways (Fig. 3M-N and Fig. S7).  
199

200 **The phase tuning of D1+, A2A+, and Oprm1+ SPNs is task-specific and highly**  
201 **conserved across sessions and days.**

202 We next investigated whether the tuning profile of individual SPNs representing discrete  
203 behaviors in the open field was conserved in the choice task during similar actions (e.g.  
204 turning, stopping). We therefore defined whether SPNs showed comparable tuning during  
205 similar movements across the two different contexts and environments. To track individual  
206 SPNs across different behavioral contexts, we recorded the activity of single neurons from  
207 the D1+, A2A+, and Oprm1+ pathways first in the open field and immediately after in the two-  
208 choice task, without removing the miniscopes to ensure accurate tracking of neuron identity.  
209 We found that Oprm1+ SPNs with significant and highly stereotyped tuning for example to a  
210 left turn in the open field remapped their tuning profile in the choice task and instead  
211 represented the right-center port movement (Fig. 4A-C and S8). Similarly, a sharply left-  
212 center port tuned Oprm1+ SPN in the choice task showed no significant tuning in the open  
213 field (Fig. 4D-F and S8). When we compared the tuning of neurons for left or right turns  
214 between the open field and the two-choice task, we found that tuning preference between  
215 the two behavioral contexts were largely independent (Fig. 4G). Supporting the non-

216 conserved tuning profile of SPNs between the two behavioral contexts, when comparing the  
217 primary tunings of all SPNs between the open field and the two-choice task we found that the  
218 tuning identity of SPNs was not conserved across the two contexts (Fig. 4H and Fig. S8).  
219 Since remapping of SPN tuning was evident between behavioral contexts within a single day,  
220 we further investigated whether the tuning profile within a single behavioral context was  
221 stable across sessions (i.e. over several days), we tracked the activity of single neurons in  
222 the choice task over days to weeks (Fig. 4I). We found that the significantly phase-tuned  
223 neurons maintained their tuning profile across several recording sessions, even for very  
224 sharp phase tunings (Fig. 4J and Fig. S8). Importantly, the conservation of SPN tunings  
225 across days was confirmed as we could use SVMs trained on neuron activity from one  
226 session to predict the trial phase in sessions from subsequent days (Fig. 4K). In summary,  
227 we found that the tuning profile of SPNs remapped in a context-specific fashion, thereby  
228 forming complex action representations that are stable and unique for each behavioral  
229 context.

230

### 231 **D1+, A2A+, and Oprm1+ pathways represent the task strategy and the action value.**

232 The tuning of neurons in the D1+, A2A+, and Oprm1+ pathway to specific trial phases  
233 revealed a structured activity pattern that represented the entire trial structure. In addition to  
234 the representation of the trial phases, mice in the choice task also needed to keep track of  
235 more abstract task variables, such as the value and outcome of actions. To map the neuron  
236 activity that differentially represents the variables that match value and decision aspects of  
237 the task, we first identified neurons with activity patterns that showed modulation by the trial  
238 outcome and subsequent choice, which define the win-stay versus lose-switch strategy. We  
239 found examples of Oprm1+ SPNs that showed modulation by trial type, either increasing their  
240 activity during lose-switch decisions or increasing activity in win-stay strategies (Fig. 5A and  
241 Fig. S9). These examples of Oprm1+ SPNs with strong tuning to action value and trial type  
242 were rare, and to better characterize their prevalence we calculated the win-stay versus lose-  
243 switch selectivity score for neurons in each trial phase. We found that the D1+, A2A+, and  
244 Oprm1+ pathway selectivity scores were similarly distributed (Fig. 5B). In addition, all three  
245 pathways showed a similar proportion of neurons significantly tuned to the win-stay and to  
246 lose-switch trial type, further supporting a pathway-independent representation of the task  
247 (Fig. 5C). The value modulation was often phase-specific and not persistent throughout the  
248 trial, and it was common for SPNs to show some value modulation in more than one phase.



249 The proportion of SPNs with win-stay or lose-switch selectivity in each trial phase was similar  
250 in all three pathways (Fig. 5D-F).

251 To extract the decision variables that accounted for win-stay versus lose-switch, and  
252 specifically the impact of reward history on the behavior, we estimated the trial by trial action  
253 value using logistic regression (Fig. 5G). The action value estimates accurately reflected the  
254 choices and decisions made by the mice (Fig. 5H). To visualize the neuron activity showing  
255 trial type selectivity, we focused on a single decision-relevant phase following the outcome in  
256 the right port (the right port to center port turn) and the representation of action value in that  
257 phase (Fig. 5I-N). We first selected neurons with a significant lose-switch selectivity score in  
258 this phase, and plotted the average activity of each neuron during the three main trial types  
259 (win-stay, lose-stay, lose-switch).

260 The lose-switch selective neurons were as expected more active in the lose-switch trial type  
261 compared to the win-stay trial type (Fig. 5I). During the lose-stay trial types, these neurons  
262 instead showed an intermediary activity profile, suggesting that the population is encoding  
263 value rather than trial type identity. We found that the activity of the lose-switch selective  
264 neurons was negatively correlated with action value (Fig. 5J). Importantly, since vigor of  
265 behavioral response as a metric of motivation could confound the activity signals, we verified  
266 that the activity and action value negative correlation could not be explained by a correlation  
267 with the action duration (Fig. 5K). We repeated the same analysis for neurons with a  
268 significant win-stay selectivity score. The win-stay selective neurons showed increased  
269 activity in win-stay trials compared to lose-stay trial in the center to right turn phase, and  
270 showed an intermediate activity level in lose-stay trials (Fig. 5L). Correspondingly, the activity  
271 of win-stay selective neurons showed positive correlation with the action value, which was  
272 not explained by the action duration (Fig. 5M-N).

273 The action value signal during the return from the right port to center port phase prompted us  
274 to determine whether the value and decision variables could be found in other task phases  
275 as well. We therefore trained SVMs to predict win-stay versus loses-switch trial types for each  
276 of the eight discrete phases of the task. We found that the single neuron activity in the D1+,  
277 A2A+, or Oprm1+ pathway contained information to accurately decode the trial type in every  
278 trial phase within a session and across sessions (Fig. 5O and Fig. S9). To exclude that the  
279 prediction accuracy depended on differences in the structure of the behavior between trial  
280 types (e.g. turning speed), we trained SVMs on the action duration and found that they could  
281 not accurately predict the trial type, demonstrating that the win-stay or lose-switch activity  
282 signals were not reflecting the vigor of the action (Fig. 5O).

283 The representation of win-stay versus lose-switch we have described could reflect the choice  
284 or most recent outcome, rather than the action value. To disentangle these possibilities, we  
285 applied the SVM model to the three trial types (win-stay, lose-stay, lose-switch) separately.  
286 The SVMs were trained to distinguish lose-switch from win-stay trial types, based on choice  
287 or outcome, but not the action value per se. We specifically investigated whether the SVMs  
288 would be more confident of the win-stay/lose-switch classification depending on the action  
289 value. We found that within each trial type the action value was separately correlated with the  
290 confidence in the prediction (Fig 5P-Q). Importantly, this correlation was also found in the  
291 lose-stay trial type that was never used for SVM training. This suggests that in addition to  
292 choice and outcome, information about the action value is also present in the activity and is  
293 used by the SVMs to classify the trial types.

294 Supporting the evidence for pathway-independent representation of action value and trial  
295 type, the SVM decoding of the trial type was similarly dependent on the action value in the  
296 D1+, A2A+, and Oprm1+ pathway (Fig. 5P-Q and Fig. S9). To verify that these results were  
297 not contingent on the definition of the action value, we calculated action values based on Q-  
298 learning and found this model replicated the correlation between SVM confidence and action  
299 value (Fig S10). In summary, the action value representation by SPNs was phase-specific  
300 during the trial, independent of action duration or motivation, and importantly was evident in  
301 all striatal output pathways.

302

## 303 **DISCUSSION**

304 The dorsomedial striatum, and in particular the Oprm1+ striatal patches, are suggested to  
305 carry signals on the value of actions, the chosen behavioral strategies, and underlie goal-  
306 directed behaviors. We found that the Oprm1+ pathway shows a surprisingly broad tuning to  
307 all the investigated behavioral variables, with individual SPNs showing sharp tuning to  
308 specific movements, and tuning to discrete actions in a choice task, and therefore do not  
309 encode a single decision-making variable such as the type or value of the ongoing trial, and  
310 as a population form a continuous representation of the motor and action program that is very  
311 similar to the representation in the direct and indirect pathway.

312 We have shown how the activity of SPNs can describe the entire action space including key  
313 variables related to trial type and decision-making (e.g. win-stay strategy, value of the  
314 selected action), and importantly that this representation is found in all three major striatal  
315 output pathways. We found that the activity did not simply reflect the individual actions as  
316 unitary and discrete motions (e.g. left turns) but instead captured the complexity of the task

317 structure, by integrating value and trial phase information for the execution of a specific  
318 action. Individual SPN activity tiled the entire task space, forming a continuous representation  
319 of all the actions required to perform the task. Supporting the role of these representations  
320 for the proper task execution is the conserved and highly stereotypical tuning of individual  
321 SPNs to specific actions in a single trial phase over many behavioral sessions and days.  
322 Interestingly, the remapping of SPN tuning between the open field and the choice task point  
323 to a context-dependent representation of discrete motor-action variables by individual SPNs  
324 and further supports that the SPN activity does not represent one dimension of the action  
325 (i.e. the concept of a left turn).

326 It was surprising to find the extent of similarity in the tuning profile between the three  
327 molecularly and neuroanatomically distinct output pathways of the striatum, considering the  
328 suggested specialization of each pathway in motor programs. The standard basal ganglia  
329 model of antagonistic signals in the direct versus indirect pathways is supported by  
330 optogenetic manipulations, demonstrating their opposing or differential effects on  
331 reinforcement, choice, and action sequences (Geddes et al., 2018; Kravitz et al., 2012; Tai  
332 et al., 2012). In contrast, recording of the striatal pathway activities during motor behavior  
333 does not reveal a clear distinction between the pathway activities (Cui et al., 2013; Tecuapetla  
334 et al., 2016). Interestingly, the encoding of action value has been found in dorsomedial as  
335 well as the more motor-related dorsolateral striatum (Stalnaker et al., 2010), including a  
336 pathway bias in value encoding (Shin et al., 2018), supporting a complex and rich  
337 representation of motor and decision-making variables across striatal regions.

338 The temporally organized activation of SPN subtypes has been proposed to be a key  
339 mechanism in representing the motor program either as start-stop signals (Jin and Costa,  
340 2010) and action chunking (Graybiel, 1998) or as continuous sequence representations  
341 (Akhlaghpour et al., 2016; Geddes et al., 2018; Sales-Carbonell et al., 2018), while other  
342 studies have emphasized role of SPNs in categorical coding of value (Samejima et al., 2005;  
343 Wang et al., 2013). The activity in dorsolateral striatum during a simple locomotion task could  
344 not be clustered (Sales-Carbonell et al., 2018), suggesting that the motor-related activity of  
345 SPNs is high-dimensional and instead contains mixed representations of several variables.  
346 Studies have shown that the dorsal striatum contains neurons that encode spatial information  
347 (Hinman et al., 2019; van der Meer et al., 2010), visual and tactile information (Reig and  
348 Silberberg, 2014), delay periods (Akhlaghpour et al., 2016) and time (Mello et al., 2015),  
349 signals that together can shape the representation of behaviorally relevant information. The  
350 diverse representation of for example space, time and trajectory that previously have been

351 found in striatal neurons suggest a complex integration of various behaviorally relevant  
352 signals in individual SPNs. Our findings support a model where the encoding of action  
353 sequences, strategy and value are simultaneously represented during action selection, by  
354 integrating motor and decision signals that are uniquely representing a behavioral context, to  
355 ultimately form a continuous representation that is relevant for proper task learning and  
356 performance. Models of the basal ganglia as an actor-critic system suggest that the patch  
357 compartment plays the role of the critic while the actor is implemented in the matrix  
358 compartment (Barto, 1995; Doya, 1999). Even if our findings on the clear overlap between  
359 representations found in Oprm1+ as well as D1+ and A2A+ pathways is challenging this view,  
360 it is interesting to note that recent work in deep reinforcement learning has proposed that it  
361 could be beneficial to share parameters between actor and critic in early layers of artificial  
362 neural networks (Mnih et al., 2016). Therefore, a similar neural representation in patch and  
363 matrix pathways might analogously form a basis for both evaluative and selective processing  
364 in the downstream targets.

365 It will be valuable to determine the role of the different input pathways and to what extent they  
366 shape the rich representation found in the striatal pathways. The dorsomedial striatum  
367 receives prominent inputs from the frontal cortex, which contains key decision signals (Hwang  
368 et al., 2019; Padoa-Schioppa and Assad, 2006). The multi-tuning and multiplexing of task-  
369 relevant signals has been observed in a number of cortical circuits (Musall et al., 2019;  
370 Steinmetz et al., 2019; Stringer et al., 2019), and some of these circuit calculations are likely  
371 to be transmitted and represented in the striatal circuitry (Peters et al., 2019). Even if the  
372 corticostriatal functional connectivity has not been comprehensively defined at the detail of  
373 single SPNs, the corticostriatal organization has been proposed to generally be pathway-  
374 specific (Gerfen, 1989; Lei et al., 2004; Wall et al., 2013), although evidence also points to  
375 converging organization (Smith et al., 2016; Zheng and Wilson, 2002). This organization of  
376 corticostriatal inputs carrying signals that are distributed to all types of SPNs could underlie  
377 the broad tuning we have observed.

378 The technical limitations in terms of the dynamics captured by calcium imaging could obscure  
379 some aspects of differential activity in the three output pathways, such as pathway-specific  
380 tonic firing rate changes or differences in event-locked latency, and our conclusions therefore  
381 are based on a general description of how the observed SPN activity reflects the main  
382 aspects of behavior. In addition, more detailed analysis of the kinematics and recording of an  
383 even larger number of SPNs or simultaneous recording of SPNs in different striatal regions

384 can provide an even better description of the differences and similarities in the signals  
385 represented by different striatal outputs.

386 We found that Oprm1+ SPNs integrate detailed aspects of motor-action signals, carrying  
387 signals about the movement, behavioral context, trial phase, and strategy, to produce a rich  
388 representation of the progression through the task as well as action value and choice  
389 variables, and that this complete representation is found in the D1+ direct and A2A+ indirect  
390 striatal pathways as well. The high-dimensional representation of the entire task and the  
391 context-dependent tuning of individual SPNs must be considered when developing circuit  
392 models of the basal ganglia to understand motor and action behavior. We therefore propose  
393 that the dorsomedial striatum broadcasts an ergocentric (greek [ἐργον]: work, task)  
394 representation of the entire task to all downstream targets: the neuron activity is a merged  
395 representation of the phase-specific action together with abstract representation of key  
396 decision-making variables of the task space including upcoming choices and the value of  
397 specific actions.

398

399

400

401

402

403

404

405

406

407

408

409

410

411

412 **AUTHOR CONTRIBUTIONS**

413 M.W. performed behavior experiments, analyzed and interpreted data. E.W. analyzed and  
414 interpreted data. I.L. interpreted data and performed surgeries and behavior experiments.  
415 O.T. characterized the Oprm1-Cre mouse line. K.M. designed the study, interpreted data,  
416 and wrote the manuscript. All authors discussed and commented on the manuscript.

417

418 **ACKNOWLEDGEMNTS**

419 Funding for this study was provided by the Swedish Research Council (Vetenskapsrådet,  
420 Medicin och hälsa), the Swedish Brain Foundation (Hjärnfonden), Karolinska Institutet (KID  
421 doctoral funding for M.W., E.W., O.T.).

422

423 **COMPETING INTERESTS**

424 The authors declare no competing interests.

425

426



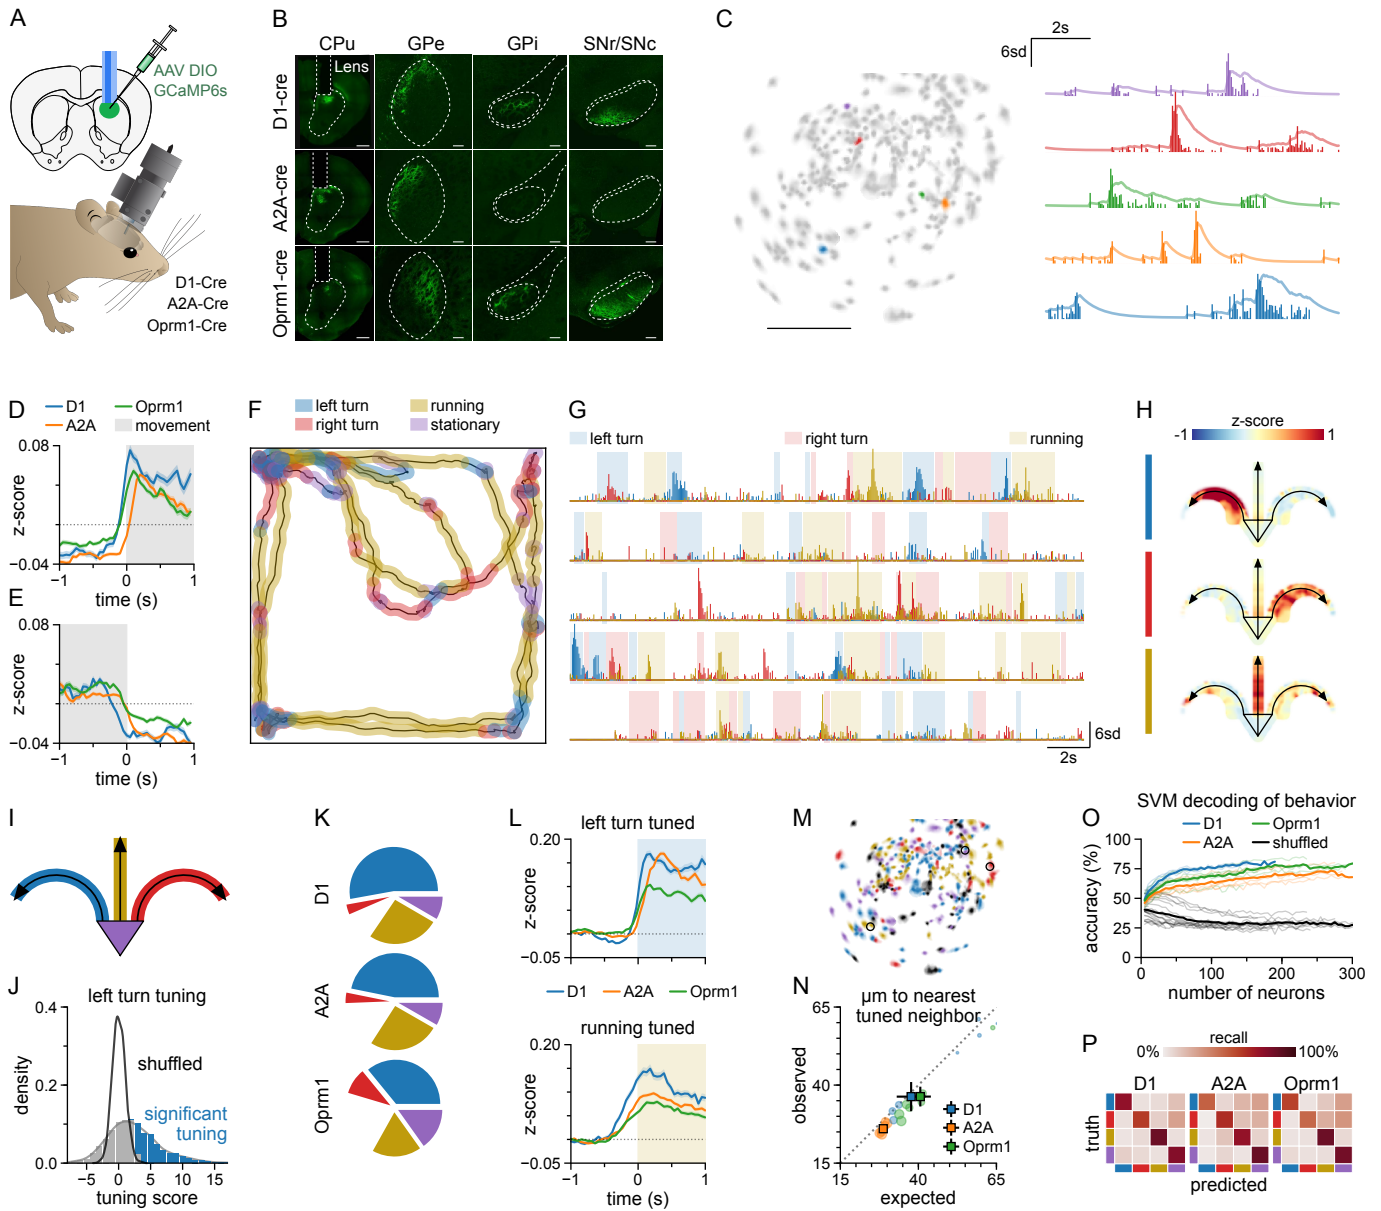

427 **FIGURE 1. The activity of dorsomedial D1+, A2A+, and Oprm1+ SPNs during**  
428 **locomotion.**

429 A) Illustration of experimental approach to image neuron activity in SPNs of the dorsomedial  
430 striatum (DMS). A Cre-dependent AAV vector was injected into D1-Cre (direct pathway),  
431 A2A-Cre (indirect pathway), or Oprm1-Cre (patch pathway) mice (top). Mice were implanted  
432 with a GRIN lens. Calcium signals were recorded with head-mounted miniscopes (bottom).

433 B) Images show Cre-dependent GCaMP6s expression (green) in caudate putamen (CPu),  
434 globus pallidus externa (GPe), globus pallidus interna (GPi), and substantia nigra (pars  
435 reticulata and compacta, SNr/SNc). Scale bars: 1 mm in the first column, 200 $\mu$ m in the other  
436 panels.

437 C) Example of neurons detected in the field-of-view of a single recording session by the  
438 CNMF-E algorithm (left map). Calcium signals from the five neurons color-coded in the map.  
439 Transparent lines show denoised fluorescence and opaque bars the deconvolved signal.  
440 Scale bar: 200 $\mu$ m.

441 D) Population average activity aligned to movement onset. Lines show mean, shaded areas  
442  $\pm$ SEM; n=632 D1-neurons from 7 sessions, 1604 A2A-neurons from 6 sessions and 1465  
443 Oprm1-neurons from 10 sessions.

444 E) Population average activity aligned to movement offset. Lines show mean, shaded areas  
445  $\pm$ SEM; n=632 D1-neurons from 7 sessions, 1604 A2A-neurons from 6 sessions and 1465  
446 Oprm1-neurons from 10 sessions.

447 F) Example showing the behaviors detected in the open field arena (2 minutes, Oprm1+  
448 mouse). The behavior was segmented into left turns, right turns, running bouts and  
449 quiescence. Color-code same as in panel G.

450 G) Deconvolved signals for three selected neurons in the patch pathway (Oprm1+ mouse,  
451 behavior shown in F).

452 H) Heatmaps of the average responses of the three neurons in G during the four segmented  
453 behaviors. Arrows represent the three movements, the triangle quiescence.

454 I) Open field task schematic indicating the color coding of the segmented behaviors. Same  
455 color code used in panels K, M and P.

456 J) Histogram of the left turn tuning scores of all Oprm1+ neurons (n=1465 from 10 sessions).

457 K) The proportion of neurons of each primary tuning for all three Cre lines. Color code follows  
458 I. n=632 D1-neurons from 7 sessions, 1604 A2A-neurons from 6 sessions and 1465 Oprm1-  
459 neurons from 10 sessions

460 L) Average activity of left turn and running-tuned populations around the onset of the  
461 respective behavior. n(left turn) = 514 tuned D1-neurons from 7 sessions, 1324 tuned A2A-  
462 neurons from 6 sessions, 1210 tuned Oprm1-neurons from 10 sessions. n(running) = 330  
463 tuned D1-neurons from 7 sessions, 1032 tuned A2A-neurons from 6 sessions, 737 tuned  
464 Oprm1-neurons from 10 sessions.

465 M) Example field of view illustrating the spatial distribution of individual neurons color-coded  
466 according to their primary tuning. Oprm1+ mouse, color code follows I.

467 N) The observed average distance of each neuron significantly tuned to a behavior to its  
468 closest neighbor tuned to the same in comparison to the average minimum distance expected  
469 by chance (computed based on repeated shuffles of neuron identity). Circles: single session  
470 averages, radii proportional to the number of recorded neurons. Squares: average value for  
471 each Cre-line, sessions weighted by the number of neurons. Error bars:  $\pm$ SEM  
472 (bootstrapped). N=7 sessions from D1-Cre mice, 6 sessions from A2A-Cre mice, 10 sessions  
473 from Oprm1-Cre mice.

474 O) Decoding accuracy of support vector machines (SVMs) trained to predict the current  
475 behavior from neuron activity. Thin lines: single sessions; thick lines: average for each Cre-  
476 line. Black lines: behavior labels segment-wise shuffled. N=7 sessions from D1-Cre mice, 6  
477 sessions from A2A-Cre mice, 10 sessions from Oprm1-Cre mice.

478 P) Average confusion matrix of SVM predictions. All of a session's neurons were used to train  
479 the SVM; confusion matrices were averaged with the population size as weights. Behaviors  
480 are color coded following I. N=7 sessions from D1-Cre mice, 6 sessions from A2A-Cre mice,  
481 10 sessions from Oprm1-Cre mice.

482  
483

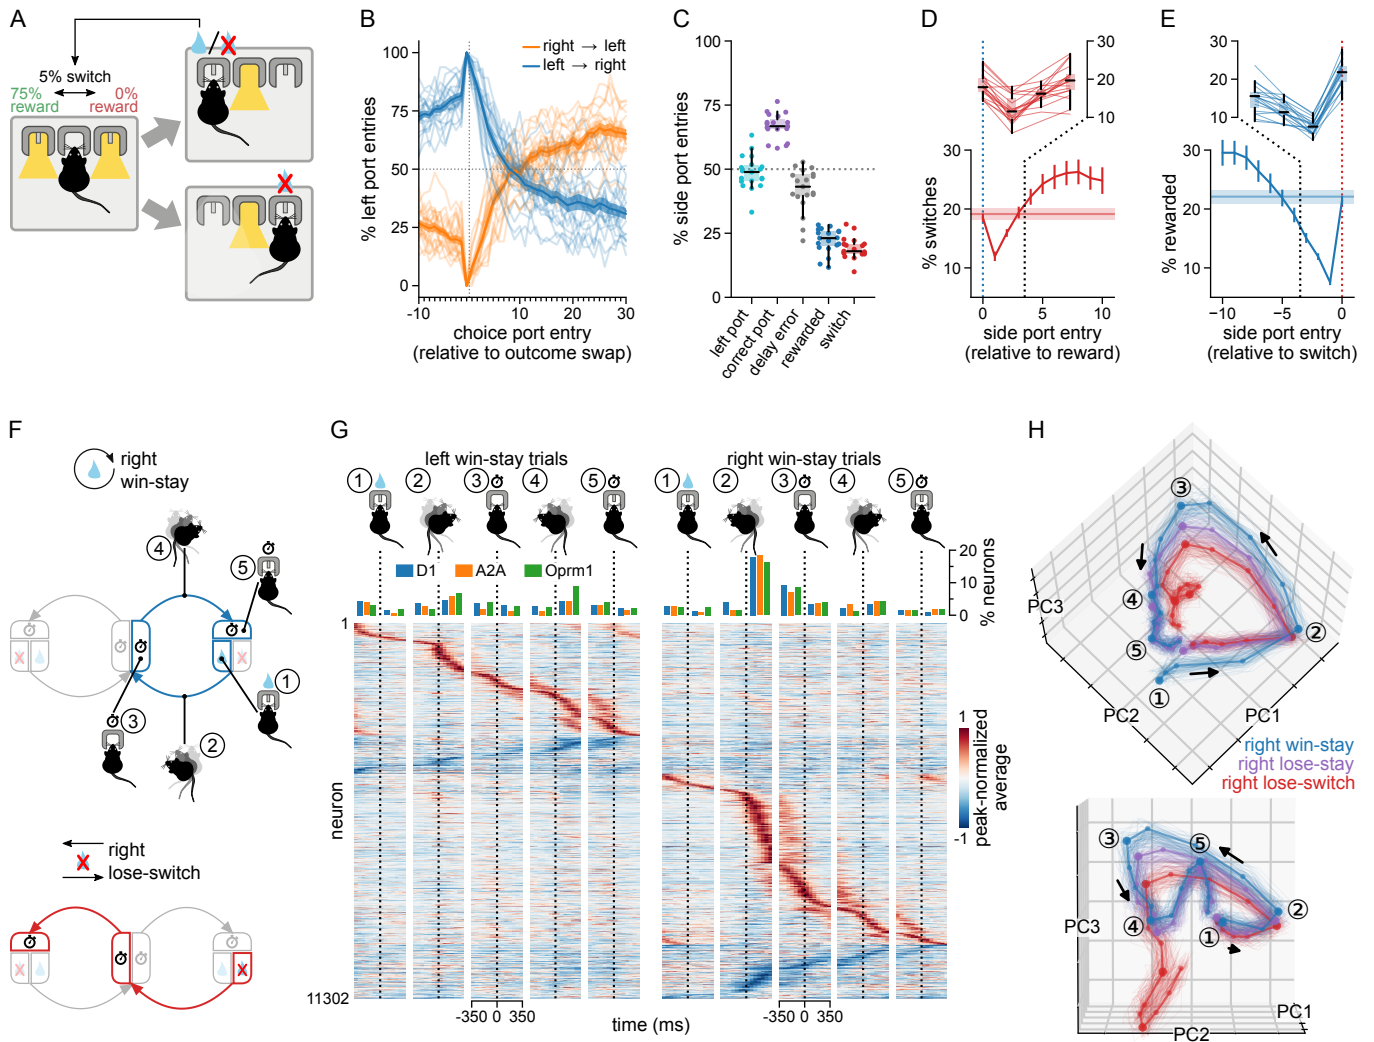

484 **FIGURE 2. The D1+, A2A+, and Oprm1+ SPNs represent the action space of a choice**  
485 **task.**

486 A) Illustration of the 2-choice switching task. Mice initiated a trial by poking the central port,  
487 followed by a choice for one of the side ports. Only one side port delivered sucrose rewards  
488 (reward probability of 75%). 5% of reward deliveries were followed by a covert switch of  
489 reward delivery side. To initiate trials or receive rewards, mice had to stay a minimum of 350  
490 ms in the respective ports.

491 B) Mice successfully shifted their port preference after covert switches of the rewarded port.  
492 A switch of the reward from the right to the left port was followed by a gradual increase in the  
493 fraction of left port entries on subsequent trials (red line), a left to right switch vice versa (blue  
494 line). Reward port switches only occurred after rewarded choices. n = 3167 switches. Thin  
495 transparent lines: individual mice.

496 C) Key statistics of the behavior. *Correct port*: entry into the port currently assigned the  
497 reward. *Delay error*: failure to trigger a choice port due to premature withdrawal (<350ms)  
498 from same or the initiation port. *Switch*: choice of the port not selected last. n=299083 trials  
499 from 271 sessions from 19 mice. Transparent dots: individual mice.

500 D) Win-stay behavior: The probability of a choice switch was lowest immediately after a  
501 rewarded choice (side port entry 0). Horizontal line: overall average fraction of switch choice  
502 port entries. Thin transparent lines: individual mice.

503 E) Lose-switch behavior: Mice were least likely to obtain rewards (i.e. were most likely to  
504 lose) on choice port entries preceding a switch choice (side port entry 0). Horizontal line:  
505 overall fraction of rewarded choice port entries. Thin transparent lines: individual mice.

506 F) Illustration of "win-stay" (top) and "lose-switch" (bottom) trials after right side port  
507 outcomes. The outcome phase was treated as the start of the trial to reflect the dependence  
508 of a stay or switch choice on the outcome obtained last; a win-stay trial starts with a win  
509 (reward), a lose-switch trial with a loss (no reward). The task space was defined by twelve  
510 trial phases. Rectangles correspond to time spent in the center or outcome ports (left, right).  
511 Arrows represent movements between the ports. The center port is split into two phases  
512 according to the direction of the upcoming choice. Side ports are subdivided into the delay  
513 period (clock in upper rectangle), and reward (drop, inner part) and omission (x, outer part)  
514 phases.

515 G) The average response of neurons to the phases of left and right port win-stay trials,  
516 centered on the phase onset times (time 0, window:  $\pm 350$  ms). Neurons were peak-sorted.  
517 The bar charts indicate the percentage of neurons of each pathway (color-coded) with a  
518 positive peak falling within the 350 ms time window in the raster below. Pooled data from all  
519 recordings.

520 H) Pseudo-trial activity trajectories based on single trial data pooled over all neurons  
521 recorded. The trajectories separate by trial type (color-coded), appearing ordered according  
522 to value implicit in the strategic choice made (win-stay > lose-stay > lose-switch). Trials were  
523 binned in scaled time (4 bins per phase). Trials were drawn in random order for every neuron.  
524 D1+ n=376; A2A+ n=1663; Oprm1+ n=1864 neurons; from 5, 5, 16 sessions, respectively.  
525 Mean trajectories of the pseudo-trial data used for dimensionality reduction (PCA; thick lines)  
526 and resampled pseudo-trials (thin lines).

527 Error bars and shading:  $\pm$ SEM. Boxplot whisker range: upper (lower) quartile to highest  
528 (lowest) value within 1.5 IQR

529

530



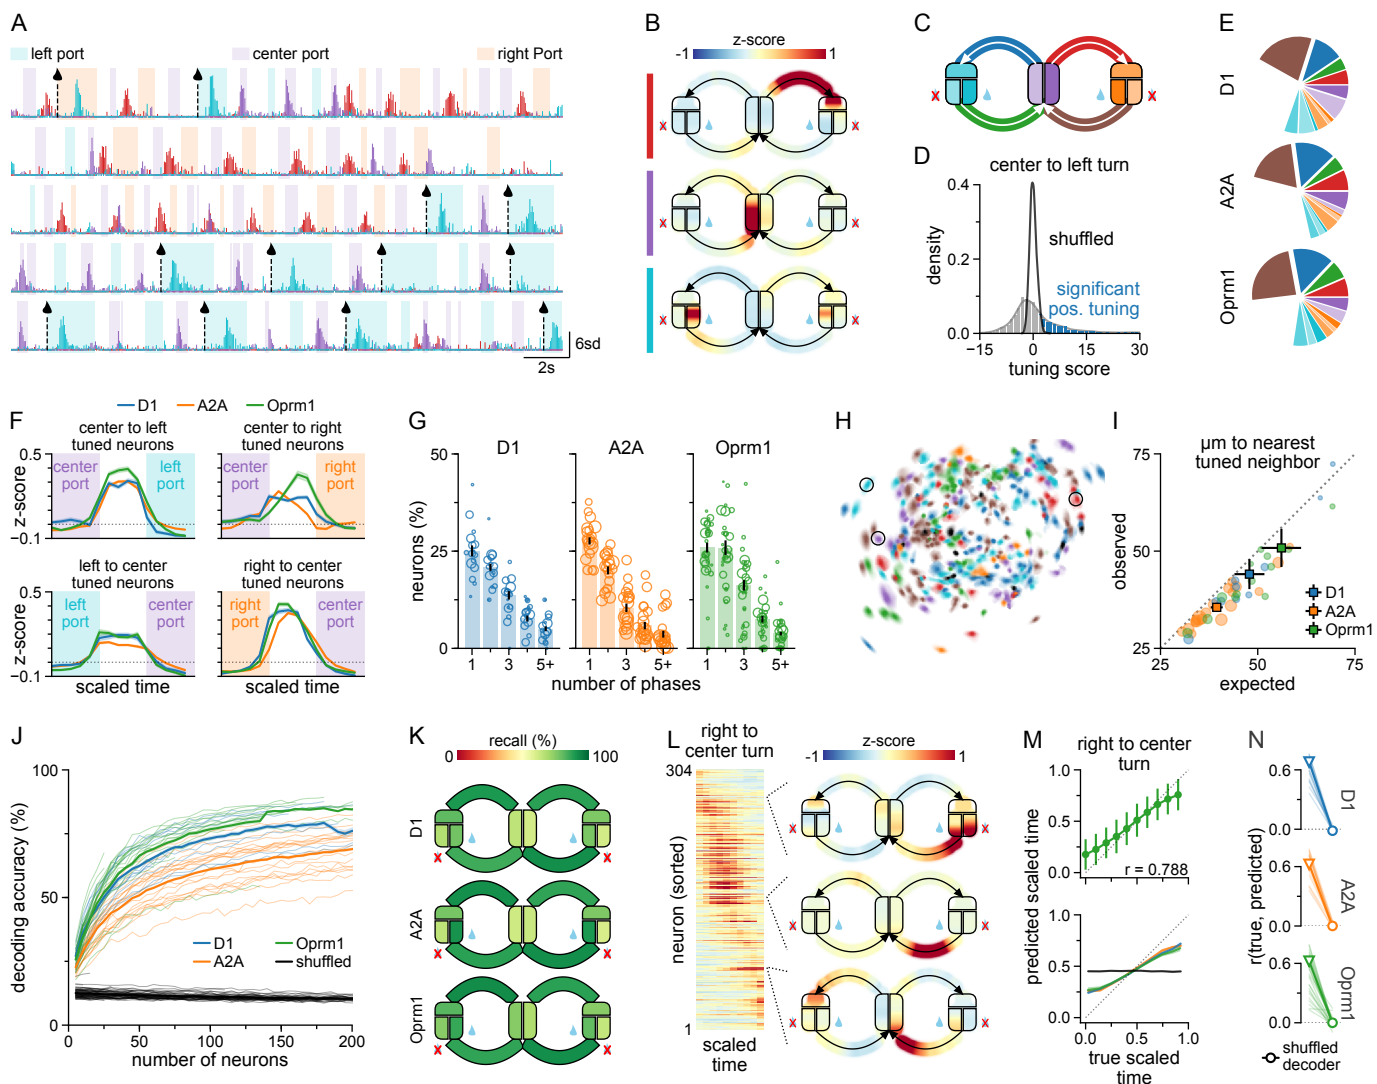

531 **FIGURE 3. The D1+, A2A+, and Oprm1+ SPNs share a similar representation of the trial**  
532 **phases.**

533 A) Deconvolved traces from three example neurons, respectively tuned to the center-to-left  
534 turn (red), the center port delay phase which precedes a left turn (purple), and left port reward  
535 delivery. Shading indicates port occupancy. Black dashed lines and drop pictograms mark  
536 reward delivery.

537 B) The average activity of three example neurons in every trial phase over the entire recording  
538 session plotted as heatmaps structured according to the 2-choice task schematic. The  
539 neurons are the same as in panel A; color bars indicate correspondence. Trial-level phase  
540 activity scaled to uniform length.

541 C) Illustration of the 2-choice task schematic divided into twelve phases. Rectangles  
542 correspond to time spent in the center or outcome ports (left, right). Arrows represent  
543 movements between the ports. The center port is split into two phases according to the  
544 direction of the upcoming choice. Side ports are subdivided into the delay period (upper part),  
545 and reward (drop, lower inner part) and omission (x, lower outer part) phases. Reference for  
546 phase color-coding in panels E, F and H.

547 D) Histogram of the center-to-left movement tuning scores of all Oprm1+ neurons (n=2793).  
548 The tuning scores were computed by z-scoring neurons' mean activity with the mean and  
549 standard deviation of a sampling distribution obtained using block-wise shuffled behavior  
550 data. Significance: mean activity above the 99.5th percentile.

551 E) Pie charts proportioned according to neurons' primary phase-tuning, per Cre-line. Colors  
552 follow C. n=1943 D1-neurons, 6566 A2A-neurons, 2793 Oprm1-neurons.

553 F) Average activity of 4 of the 12 populations defined by phase-tuning (the movements) during  
554 the phase they are tuned to. n(center-to-left neurons) = 413/1517/751; n(center-to-right  
555 neurons) = 279/928/426; n(left-to-center neurons)=228/883/424; n(right-to-center  
556 neurons)=581/1785/996 (D1/A2A/Oprm1).

557 G) Bar plots of the weighted mean percentage of neurons significantly tuned to several counts  
558 of phases, by Cre-line. Sessions were weighted by the number of neurons. Circles: single  
559 sessions, radii proportional to number of neurons. Error bars:  $\pm$ SEM (bootstrapped).

560 H) Oprm1+ single-cell ROIs for an example session, color-coded by primary tuning. Black:  
561 no significant tuning. Circles mark ROIs whose activity is shown in A and B.

562 I) Similarly tuned neurons are marginally closer in space than expected by chance (N=16 D1-  
563 sessions, 19 A2A-sessions, 30 Oprm1-sessions).

564 J) Decoding accuracy (fraction correctly predicted phases) for randomly sampled SPN sub-  
565 populations of increasing size. Thin lines: single sessions. Thick lines: average per Cre-line.  
566 N=16 D1-sessions, 19 A2A-sessions, 30 Oprm1-sessions.

567 K) The SVM decoding recall by phase when trained on the full population of each session.  
568 The average recall was weighted by the number of neurons in each session.

569 L) Sequential neuron activity through a task phase. Raster plot of the average activity for all  
570 neurons recorded in an example session (Oprm1+, right port to center port movement).

571 Neurons sorted by the peak of the activity (left panel). Heatmaps show three example  
572 neurons across the entire task space in the same session (right panel).

573 M) The trial phase substructure can be decoded from neuron activity. Top panel: the actual  
574 versus the decoded time progression through the phase (right port to center port turn) for the  
575 session shown in L. Bottom panel: the actual versus decoded progress through the phase  
576 averaged over all sessions. Individual sessions weighted by the number of recorded neurons;  
577 Cre lines color coded as in N. Black line: decoder trained on shuffled data. Shaded area:  
578  $\pm$ SEM (bootstrapped).

579 N) The correlation between true and predicted progress through right-to-center turns for all  
580 sessions (thin lines), compared to the correlation from shuffled data. Thick lines indicate  
581 averages, weighted by the number of recorded neurons in each session. Error bars:  $\pm$ SEM  
582 (bootstrapped).  
583

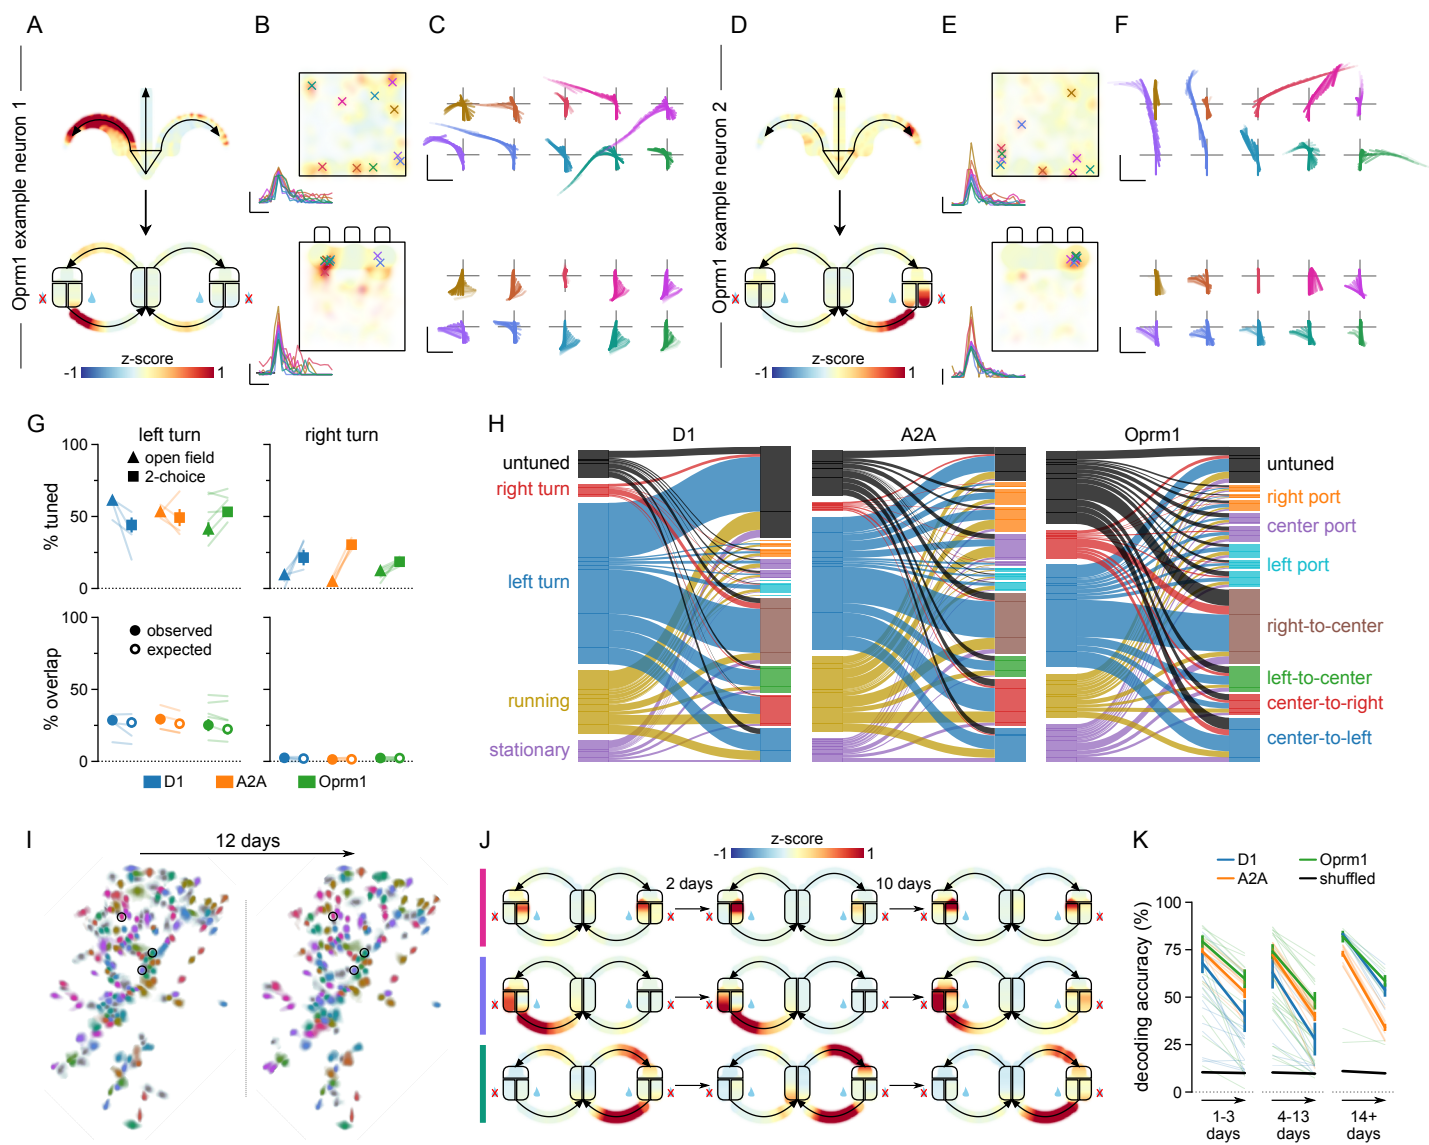

584 **FIGURE 4. The phase tuning of D1+, A2A+, and Oprm1+ SPNs is task-specific and**  
585 **highly conserved across days.**

586 A) Example of Oprm1+ neuron with remapped tuning in the open field and the 2-choice task.  
587 The neuron is tuned to left turns in the open field and to right turns (left-center port). Imaging  
588 was performed in the two tasks without detaching the miniscope.

589 B) Spatial heatmaps of the activity of the neuron shown in A in the open field arena (top) and  
590 the 2-choice operant chamber (bottom). Crosses mark the top 10 most prominent  
591 deconvolved calcium events in the respective recordings; events shown in the lower left  
592 corners of the maps. Scale bars: 10 std, 250 ms.

593 C) Movement trajectories of the animal during the top 10 most prominent calcium events  
594 shown in B. Rotated such that the animal initially faces upwards. The animal's posture is  
595 represented frame-for-frame by lines connecting the base of the tail, the center of the body,  
596 and the point between the ears. Scale bars: 5 cm, 5cm.

597 D) Example of Oprm1+ neuron recorded in the same session as neuron in A-C. Neuron does  
598 not show tuning to any of the tracked movements in the open field, but responds sharply  
599 during left turns (right-center port) in the 2-choice task.

600 E) Spatial heatmaps of the activity and the top 10 most prominent calcium events of the  
601 neuron shown in D in the open field arena (top) and the 2-choice operant chamber (bottom).

602 F) Movement trajectories of the animal during the top 10 most prominent calcium events.

603 G) Top left: Percentage of neurons significantly positively tuned to left turns in the open field  
604 and 2-choice tasks (tuned to either the center port to left or the right port to center turns),  
605 respectively. Bottom left: Comparison of the observed and randomly expected percentage of  
606 neurons tuned to left turns in both tasks. Panels in the right column show the same  
607 quantifications for right turn-tuned neurons. Sessions weighted by the number of recorded  
608 neurons (N=4 D1-sessions, 4 A2A-sessions, 6 Oprm1-sessions). Error bars:  $\pm$ SEM  
609 (bootstrapped).

610 H) Alluvial plot showing how the primary tunings in the open field (left side) change in the 2-  
611 choice task (right side). n=406 D1-neurons, 1111 A2A-neurons and 985 Oprm1-neurons  
612 were followed.

613 I) Spatial filter map of an example recording session (Oprm1-Cre) and aligned filters from a  
614 session recorded 12 days later. The depicted filters were transformed by the registration  
615 process. Colors are chosen arbitrarily, but consistent for aligned neurons. Gray filters are  
616 without a match.

617 J) Trial heatmap of 3 neurons matched across 3 sessions, including those shown in C. The  
618 colored bars match the color of the respective, circled filters in C.

619 K) SVMs decode the trial phase across sessions (color code shows pathway). Each pair of  
620 sessions (training session + test session) is shown with a transparent line, indicating the  
621 cross-validated accuracy in the training session (left) and the test session (right). The  
622 thickness of transparent lines is proportional to the number of aligned neurons for that pair.  
623 Opaque lines correspond to the average decoding accuracy across pairs of sessions,  
624 weighted by the number of aligned neurons. SVM decoding accuracy on shuffled data (black).

625 N(1-3 days) = 65/55/85 session pairs; N(4-13 days) = 25/60/85 session pairs; N(14+ days) =  
626 25/30/25 session pairs (D1/A2A/Oprm1). Error bars:  $\pm$ SEM (bootstrapped).

627

628



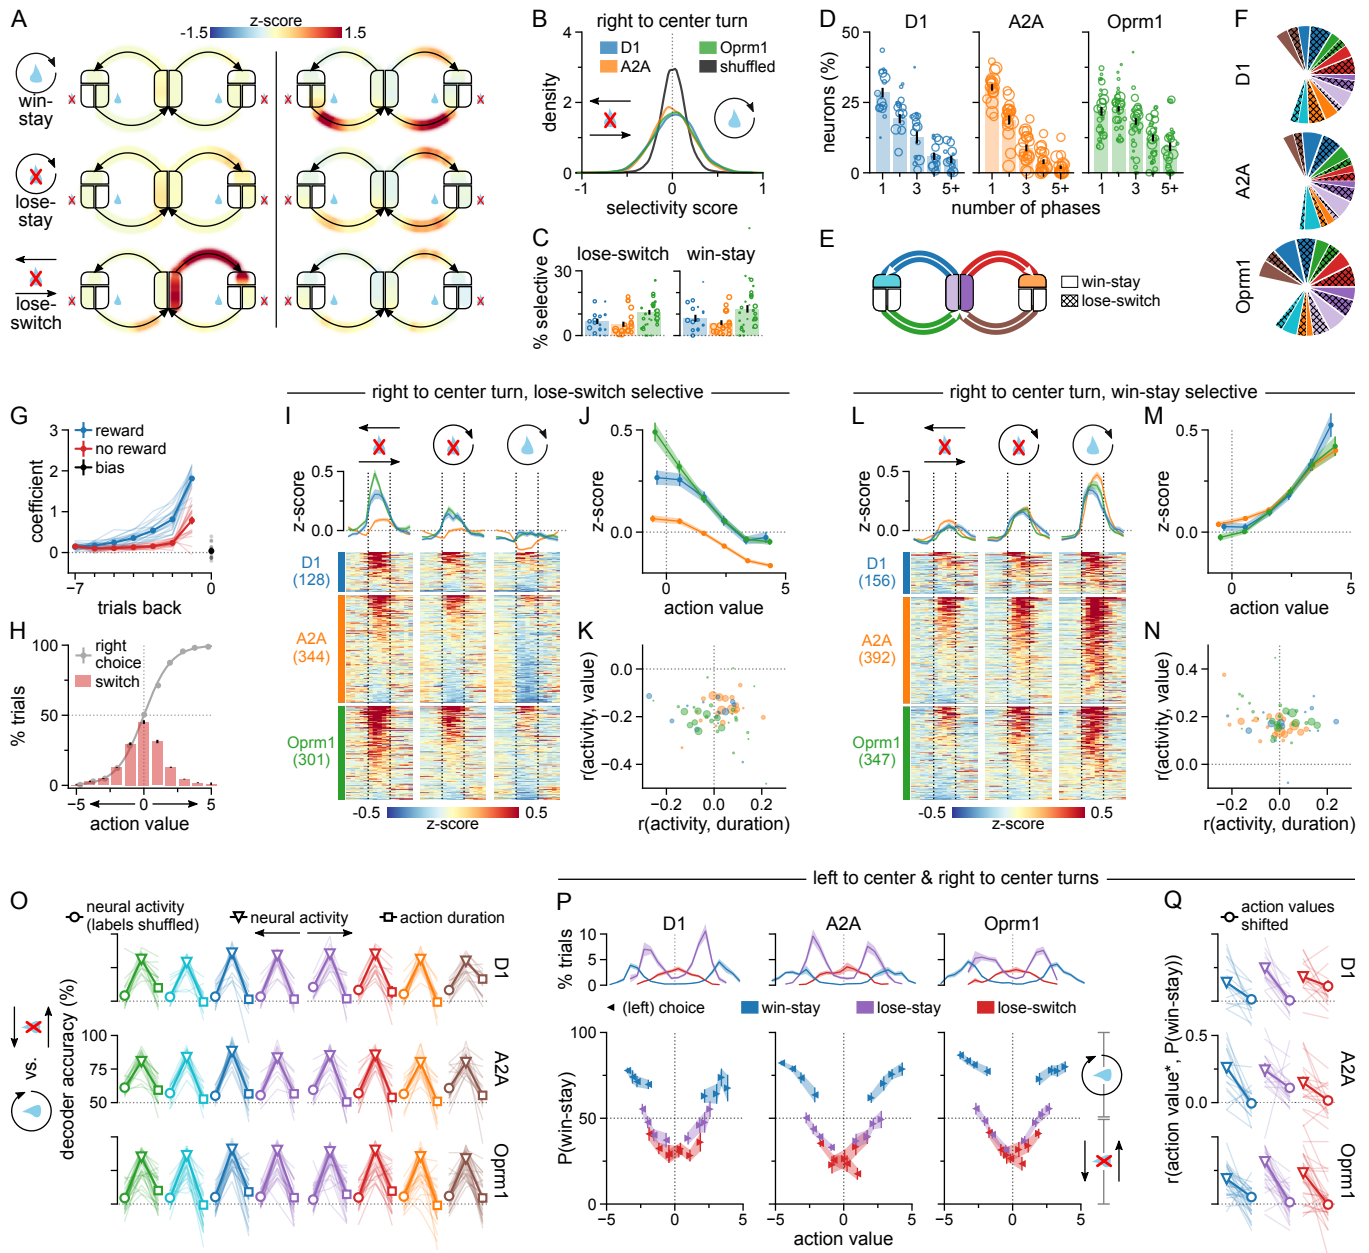

629 **FIGURE 5. The D1+, A2A+, and Oprm1+ pathways represent all aspects of the choice**  
630 **task structure.**

631 A) Example of SPNs with phase-specific evaluation for stay or switch choice. Example  
632 Oprm1+ neuron (left side) shows elevated activity in the center port preceding right port  
633 choices, as well as during the choice action, only in the context of left-to-right lose-switch  
634 trials when the value of the left choice is low. Example Oprm1+ neuron (right side) shows  
635 increased activity when returning from the choice port to the center in win-stay trials, when  
636 the value of the previous choice is high. Note that it also responds, to a lesser degree, during  
637 return movements in lose-stay trials, when the last choice is of intermediate value due to  
638 rewards received on trials prior to the recent loss (see G).

639 B) Distributions of the right port to center port turn-specific lose-switch versus win-stay  
640 selectivity scores (color code shows pathway). A positive score indicates a neuron's  
641 preferential activation on win-stay, a negative score on lose-switch trials. Selectivity scores:  
642 area under the ROC curve, scaled from -1 to 1. For comparison, selectivity scores were  
643 calculated using shuffled behavior data (black). (n=1943 D1+ neurons, 6566 A2A+ neurons,  
644 2793 Oprm1+ neurons).

645 C) The weighted mean percentage of neurons significantly selective for lose-switch (left) and  
646 win-stay (right) trials during the right port to center port phase (circles: single sessions, radii  
647 proportional to the number of neurons, error bars:  $\pm$ SEM bootstrapped).

648 D) Bar plots of the weighted mean percentage of neurons significantly win-stay or lose-switch  
649 selective to several counts of phases. Sessions were weighted by the number of neurons  
650 (circles: single sessions, radii proportional to the number of neurons, error bars:  $\pm$ SEM  
651 bootstrapped).

652 E) Illustration of the choice task with phase color-coding used in panels F and O.

653 F) The primary phase-specific win-stay or lose-switch selectivity of SPNs. (n=1943 D1-  
654 neurons, 6566 A2A-neurons, 2793 Oprm1-neurons).

655 G) Logistic regression models the impact of the outcomes of the previous seven trials on the  
656 current port choice. Mice repeated recently rewarded choices (blue), and were likely to repeat  
657 the previous choice even after one reward omission (red). Bias coefficient (black): positive  
658 values indicate right port bias. Logistic regression coefficients for individual mice (thin lines)  
659 and the mean coefficients (thick lines).

660 H) Average fraction of right port choices (grey dots) and choice switches (red bar plots) as a  
661 function of relative action value (binned). Grey curve: logistic regression prediction (data  
662 pooled over all mice). Positive (negative) action values predict right (left) port choices. Action  
663 values are the sum of coefficients shown in G. Outcome history dictates the coefficient  
664 (reward or no reward) used for each of the previous seven trials, side choice its sign (right:  
665 positive, left: negative). Dots and bars: mouse average (N=19 mice). Error bars:  $\pm$ SEM.

666 I) Scaled time raster plots of the average activity of the lose-switch selective neurons in lose-  
667 switch, lose-stay and win-stay trials. The dotted lines mark the start and the end of the right  
668 port to center port motion. The line plots above the rasters show the population mean activity.

669 J) The mean trial activity of lose-switch selective neurons at various action values (average  
670 neuron activity, binned).

- 671 K) The session-averaged Pearson correlations for lose-switch selective neurons to  
672 movement duration versus to action value. Radii reflect the number of selective neurons in  
673 the session.
- 674 L) Scaled time raster plots of the average activity of the lose-switch selective neurons in lose-  
675 switch, lose-stay and win-stay trials. The dotted lines mark the start and the end of the right  
676 port to center port motion. The line plots above the rasters show the population mean activity.
- 677 M) The mean trial activity of win-stay selective neurons at various action values (average  
678 neuron activity, binned).
- 679 N) The session-averaged Pearson correlations for win-stay selective neurons.
- 680 O) Phase-specific decoding accuracy of predicting win-stay versus lose-switch trial type from  
681 neuron activity using cross-validated linear SVMs. For each trial phase SVMs were trained  
682 on data with the behavior labels shuffled (circles), on the neuron activity data (triangles), or  
683 only on phase duration (squares). Accuracy for individual sessions (thin lines) and mean  
684 accuracy (thick lines). Sessions weighted by the number of neurons (N=16 D1-sessions, 19  
685 A2A-sessions, 30 Oprm1-sessions).
- 686 P) The SVMs probability estimates for outcome port (left or right side) to center port turns  
687 being win-stay rather than lose-switch as a function of action value. Action value correlates  
688 with the SVM prediction confidence. Win-stay trial turns are more confidently predicted in  
689 high action value trials. (blue). Lose-switch trial turns are more confidently predicted in low  
690 action value trials (red). Lose-stay trial turns with low action value (magenta) appear  
691 increasingly like lose-switch turns. Correlation scores are quantified in Q. Binning by quartiles  
692 of the pooled action value distributions. Triangles: mean probability estimate of sessions  
693 weighted by number of neurons. Shading and error bars:  $\pm$ SEM (bootstrapped). Top panel:  
694 density of each trial type by action value; average of sessions  $\pm$ SEM.
- 695 Q) Correlation between action value and the estimated probability of choice port to center  
696 turns being win-stay rather than lose-switch (action value sign reversed for left choice trials).  
697 Correlation of individual sessions (thin lines) and average correlation of sessions weighted  
698 by the number of neurons (thick lines). Color-coding as in P.

699  
700  
701

## 702 **METHODS**

### 703 **RESOURCE AVAILABILITY**

704 Further information and requests for resources and reagents should be directed to and will  
705 be fulfilled by Konstantinos Meletis ([dinos.meletis@ki.se](mailto:dinos.meletis@ki.se)).

### 706 **Materials Availability**

707 No unique materials were produced in this study.

### 708 **Data and Code Availability**

709 Data and Python code to reproduce all figures in this work will be made freely available online  
710 upon publication.

711

## 712 **EXPERIMENTAL MODEL AND SUBJECT DETAILS**

713 The 19 adult female and male transgenic mice (25–35 g) used in experiments were kept on  
714 a 12-hour light/dark cycle. We used D1-Cre (Drd1-cre EY262Gsat), A2A-Cre (Adora2a-cre  
715 KG139Gsat), and Oprm1-Cre mice (Märtin et al., 2019). Mice were single-housed after the  
716 surgeries and placed on food restriction during behavioral training and recording in the 2-  
717 choice task (maintained at min. 85% of their free-feeding body weight). All procedures were  
718 approved by the Swedish local ethics committee for animal experiments (Stockholms  
719 djurförsöksetiska nämnd, approval N166/15).

720

## 721 **METHOD DETAILS**

### 722 **Surgeries**

723 For stereotactic surgery, the mice were anesthetized with isoflurane (2% in air) and  
724 administered buprenorphine (0.03 mg/kg, subcutaneous) for analgesia. Buprenorphine was  
725 also administered for post-surgery pain-relief. A feedback-controlled heating pad maintained  
726 body temperatures at 36°C throughout the surgical procedures. All animals were unilaterally  
727 microinjected with 400 nl of AAV5-CAG-Flex-GCaMP6s into the dorsomedial striatum in the  
728 right hemisphere (AP: 1.0, ML: 1.25, DV: -2.3; rate of 100 nl/min). The pipette was retracted  
729 5 minutes after the injection finished. Two weeks after the viral injection, gradient-index  
730 (GRIN) endoscope lenses (Inscopix) of a 1 mm diameter were implanted 100-200 µm above  
731 the viral injection site. Prior to lowering the lens, portions of the overlying cortex were  
732 aspirated using a 0.5 mm-diameter, blunt-point needle with sharpened edges which was  
733 attached to a vacuum pump. The GRIN lens was fixed in place using dental cement. 4-6  
734 weeks after GRIN lens implantation, the baseplate was anchored to the skull with dental  
735 cement to support the detachable miniscope (Inscopix) during imaging. To determine the  
736 optimal placement of the baseplate, the field of view was monitored live throughout the  
737 procedure using the baseplate-attached miniscope. The miniscope was not refocused over  
738 the course of the experiments in order to improve tracking of individual neurons across days.

## 739 Histology

740 At the end of the experimental procedure mice were deeply anaesthetized with pentobarbital  
741 and then transcardially perfused with 0.1 M PBS followed by 4% paraformaldehyde in 0.1 M  
742 PBS. Brains were removed and post-fixed in 4% paraformaldehyde overnight at 4°C and then  
743 washed and stored in 0.1 M PBS. Coronal 80µm sections were cut using a vibratome (Leica  
744 VT1000, Leica Microsystems, Nussloch GmbH, Germany). Immunostaining was performed  
745 on free-floating sections in glass wells. Sections were incubated for 1 hour in 0.3% TritonX-  
746 100 in Tris-buffered saline (38mM Tris-HCl, 8mM Trizma base, 120mM NaCl in extra pure  
747 water) and treated with a preheated (40°C) antigen retrieval solution (10mM sodium citrate,  
748 0.05% Tween20, pH:6) for 1-2 minutes. In order to block non-specific antibody binding,  
749 sections were incubated in 5% Normal Donkey Serum in TBST (0.3% TritonX-100 in Tris-  
750 buffered saline) for 1 hour at room temperature. Sections were subsequently incubated  
751 overnight with primary antibodies at room temperature. The day after, sections were washed  
752 twice for 10 minutes in TBST, then incubated with secondary antibodies for 4 hours at room  
753 temperature, and finally imaged. Primary antibodies used: goat anti-GFP (1:1000 dilution,  
754 abcam: ab5450); rabbit anti-Tyrosine Hydroxylase (1:100 dilution, abcam: ab112).  
755 Fluorophores of secondary antibodies: Alexa Fluor-488 and Cy3 from Jackson  
756 ImmunoResearch Laboratories. Assessment of GRIN lens placement was based on the  
757 lesion from the lens in the tissue. Animals with misplacement of GRIN lens were excluded  
758 from the study.

## 759 Open field task

760 We tracked the mice in the open field (49×49 cm) using DeepLabCut (DLC) (Mathis et al.,  
761 2018). We manually labeled the base of the tail, the center of the body and the left and right  
762 ears in 1000 frames, sampled from all sessions. After running DLC on every open field video,  
763 we transformed the video coordinates (in pixels) to world coordinates (in cm) using a  
764 perspective transform matching the four corners of the box.  
765

766 We based our movement analysis on two markers tracked by DLC: the base of the tail and  
767 the center of the body. We used a custom particle filter (2000 particles; diagonal gaussian  
768 observation noise with  $\sigma=1$  cm; diagonal gaussian innovation noise with  $\sigma=1$  cm/frame;  
769 gaussian likelihood penalty on distance between tail base and center of body with  $\mu=3$  cm  
770 and  $\sigma=1$  cm; *systematic resampling* as defined in (Doucet and Johansen, 2011) to estimate  
771 smoothed x- and y-position as well as running speed, allocentric body direction, angular  
772 speed and body elongation.  
773

774 We then developed a custom optimization algorithm to classify each video frame as either  
775 *left turn*, *right turn*, *running* or *stationary*. First, we chose a scoring function  $P_b(s,e)$  that  
776 defined how well a segment starting at frame  $s$  and ending at frame  $e$  would fit behavior  $b$ . In  
777 particular, we chose:  
778

$$P_{\text{left turn}}(s, e) = \begin{cases} -10 & \text{if } e - s < 5 \\ -10 & \text{if } a(s, e) < e - s \\ -10 & \text{if } d(s, e) > 10(e - s) \\ a(s, e) - 0.5(e - s) - 10 & \text{otherwise} \end{cases}$$

779



780

$$P_{\text{right turn}}(s, e) = \begin{cases} -10 & \text{if } e - s < 5 \\ -10 & \text{if } a(s, e) > e - s \\ -10 & \text{if } d(s, e) > 10(e - s) \\ -a(s, e) - 0.5(e - s) - 10 & \text{otherwise} \end{cases}$$

781

$$P_{\text{running}}(s, e) = \begin{cases} -10 & \text{if } e - s < 5 \\ -10 & \text{if } |a(s, e)| > e - s \\ 5d(s, e) - 10 & \text{otherwise} \end{cases}$$

782

$$P_{\text{stationary}}(s, e) = -5$$

783

784 where  $a(s, e)$  is the signed angle difference between the animal in frame  $s$  and frame  $e$   
 785 measured in degrees, and  $d(s, e)$  is the distance in cm between the animal's position in frame  
 786  $s$  and frame  $e$ . Note that both  $a(s, e)$  and  $d(s, e)$  can be computed in constant time. The  
 787 negative terms acted as a cost on the number of segments to encourage the segments to be  
 788 as long as possible. Having this definition, we wanted to find segments of behaviors such  
 789 that the total score was maximized, i.e.

790

$$\underset{a_i, b_i, N_{\text{seg}}}{\text{maximize}} \sum_{i=1}^{N_{\text{seg}}} P_{b_i}(a_i, a_{i+1} - 1)$$

791

792

793 where  $N_{\text{seg}}$  is the number of segments,  $a_i$  is the start of segment  $i$  and  $b_i$  is the behavior of  
 794 segment  $i$  ( $a_1=1$ ,  $a_i < a_{i+1}$ ,  $a_N$ =number of frames). The optimal  $\{N_{\text{seg}}, a_i, b_i\}$  can be found very  
 795 efficiently with dynamic programming on the recurrence relation:

796

$$S_t = \max_{k, b} S_{t-k-1} + P_b(t-k, t)$$

797

798 To improve running time further, we constrained  $k < 2000$  so that the algorithm ran in linear  
 799 time.

## 800 2-choice task

801 We trained the food-restricted mice to perform a self-paced, probabilistic 2-choice task inside  
 802 custom-built operant chambers which contained three nose poke ports. The mice initiated a  
 803 choice in the center port, and were then free to choose one of the two side ports. One side  
 804 port yielded sucrose solution with 75% probability upon entry (15% sucrose, 3.75  $\mu$ l), while  
 805 the other yielded nothing. After a reward, there was a 5% probability of a reward port switch.  
 806 When no reward was delivered (due to failed trial initiation, incorrect port choice or reward  
 807 omission) the rewarded side remained the same. There were no cues to indicate the correct  
 808 port choice nor the occurrence of a reward port switch. The volume of the sucrose reward  
 809 was doubled in a random 10% of the rewarded trials. LEDs located in the ports indicated  
 810 whether a trial was in the initiation phase (center LED on) or in the choice phase (side LEDs  
 811 on). A 350 ms infrared beam break was required to trigger any port. The task was controlled  
 812 and task events recorded using a pyboard microcontroller.

813

814 Animals failed to trigger the reward ports in almost half of their attempts, predominantly due  
 815 to having failed to wait out the delay in the center port first, exiting it early (<350ms; see  
 816 Figure 2C, delay error). This suggests they disregarded the LED cues indicating whether the  
 817 initiation nose poke was successful and remained unaware of their error. Thus, we included



818 every side port entry in the analysis, irrespective of whether or not the choice was properly  
819 initiated in the center port.

820

821 The effect of trial outcome history on port choice, used to compute trial-by-trial relative action  
822 value, was estimated by logistic regressions, as reported previously (Tai et al., 2012). The  
823 following regression model was fitted for each animal separately:

824

$$\log\left(\frac{P_R(i)}{P_L(i)}\right) = \sum_{j=1}^n \beta_j^{\text{Reward}} (Y_R(i-j) - Y_L(i-j)) + \sum_{j=1}^n \beta_j^{\text{No Reward}} (N_R(i-j) - N_L(i-j)) + \beta_0$$

825

826

827  $P_R(i)$  represents the probability of choosing the right side port on the current side port entry,  
828 indexed  $i$ .  $Y_R(i-j) \in \{0, 1\}$  and  $N_R(i-j) \in \{0, 1\}$  denote whether or not a right port choice was  
829 rewarded or unrewarded  $j$  entries back, respectively.  $P_L(i)$ ,  $Y_L(i)$ , and  $N_L(i)$  code the equivalent  
830 variables for left port choices. The coefficients  $\beta_j^{\text{Reward}}$  and  $\beta_j^{\text{No Reward}}$  hence capture the effects  
831 of obtaining or not obtaining a reward  $j$  trials ago on the current choice. The intercept term  $\beta_0$   
832 subsumes any static bias towards one port or the other.  $n$ , the number of past trials included  
833 in the regression, was set to 7. The coefficients were fit using maximum likelihood. The  
834 model-predicted trial-by-trial log-odds of side-port choice, negative values favoring left  
835 choice, positive right choice, served as relative action values.

836

837 To verify that our results were not dependent on calculating action values using logistic  
838 regression we also calculated action values based on Q-learning (Figure S10). We let  $Q_R(t)$   
839 denote the value of choosing the right port and  $Q_L(t)$  the value of choosing the left port.  
840 Assuming the animal enters port  $p \in \{L, R\}$  at time  $t$ , we update the corresponding value

841

$$Q_p(t_{\text{next}}) = Q_p(t) + \alpha(R(t) - Q_p(t))$$

842

843 where  $\alpha$  the learning rate and  $R(t) \in \{0, 1\}$  is the outcome. Given  $Q_R$  and  $Q_L$ , we used a  
844 logistic function to estimate the probability of the animal choosing the right port

845

$$P_R(t) = \frac{1}{1 + e^{-\beta(Q_R(t) - Q_L(t)) + b}}$$

846

847 where  $\beta$  is controlling slope of the function, and therefore the explore-exploit trade-off, and  $b$   
848 is capturing any static bias towards either side. We fitted the three parameters  $\alpha$ ,  $\beta$  and  $b$   
849 separately for each animal by maximizing the likelihood (equivalent to minimizing the  
850 negative log-likelihood)

851

$$\arg \min_{\alpha, \beta, b} \sum_{\text{sessions}} \sum_t -\log P_p(t | \alpha, \beta, b)$$

852

853 where  $p \in \{L, R\}$  is the choice at time  $t$  and  $P_L = 1 - P_R$ . We used the downhill simplex algorithm  
854 (scipy.optimize.fmin) to minimize the negative log-likelihood.

855

## 852 Imaging data acquisition and preprocessing

853 Raw calcium imaging videos (1440×1080, 20 fps) were acquired using miniscopes and the  
854 nVista Acquisition Software (2.0.4, Inscopix). To accurately align calcium transients and  
855 behavior, we recorded the sync pulses provided by the miniscope's data acquisition box in  
856 the output of the microcontroller controlling the operant task. The sync pulses also served to  
857 trigger a Blackfly USB3 video camera (FLIR) used to record both the operant and the open  
858 field experiments. 2-choice task imaging sessions lasted approximately 1 hour, open field  
859 sessions 20 min (see Supplementary tables S1-S3). Calcium imaging videos were spatially  
860 downsampled (2×2 pixel bins), cropped, and motion corrected using the Inscopix Data  
861 Processing Software (1.2.0) and exported as Neurodata Without Borders (NWB) files. We  
862 used the CalmAn (1.4.2) (Giovannucci et al., 2019) implementation of the CNMF-E algorithm

863 (Zhou et al., 2018) to extract spatial filters (i.e. ROIs) and deconvolved fluorescence traces  
864 of individual neurons. Imaging frames were downsampled (2×2 pixel bins) once more prior to  
865 running the algorithm. To adjust for bleaching, the rolling z-score ( $\pm 5$  min window) of the  
866 deconvolved activity traces was computed and used in all subsequent analysis. To match  
867 individual neurons across recording sessions, we used CalmAn's ROI-registration function.  
868 Prior to analysis, we excluded sessions with data alignment issues (dropped imaging frames)  
869 or during which the mouse did not engage in the task.

## 870 Definition of trial phases

871 Each calcium imaging frame was assigned to a trial phase solely based on the infrared beam  
872 brakes detected around that frame. Frames recorded while a particular port's beam was  
873 broken were registered as occupations of that port (i.e. nose pokes). When no beam was  
874 broken, frames were classified as movements between the port occupied last and the port  
875 entered next. We excluded thus labeled movements bypassing the center port (side port to  
876 side port), movements lasting longer than 1.5s (animal unengaged), as well as movements  
877 starting and ending in the same port (reentries), from further analysis. Nose pokes preceding  
878 unengaged periods or reentries were also excluded. We divided center port nose pokes into  
879 two different phases, depending on which side port was entered next (upcoming left or right  
880 choice). Side port nose pokes were split into three phases: the *delay* phase preceding the  
881 outcome presentation (<350ms in port) and the two mutually exclusive outcome phases  
882 (>350ms in port), *omission* and *reward*. Note that this classification approach disregards  
883 whether ports were triggered or not, i.e. nose pokes shorter than 350 ms and nose pokes  
884 addressing inactive ports (due to a delay error in the previous nose poke) are included in the  
885 analysis.

886  
887 For drawing trial heatmaps (e.g. Figure 3B) and for sub-phase decoding (Figure 3L-N), we  
888 assigned a *progress score* to each frame, defined as the count of consecutive previous  
889 frames spent in the current phase, divided by the total number of frames in the current phase.  
890 Note that this scaling of the progress was therefore based on *time* between beam breaks, not  
891 on physical space.

## 892 Pooled-population activity trajectories

893 The activity trajectories in figure 2H are based on single-trial activity pooled over neurons of  
894 all Cre lines and recording sessions (without matching neurons across sessions). Individual  
895 trials in which an animal did not follow the task structure perfectly, e.g. by reentering a port  
896 or disengaging from the task mid-way, were excluded from this analysis, as were trials in  
897 which any phase lasted fewer than 250 ms (5 frames). Whole sessions were excluded if there  
898 were fewer than 20 trials left of any of the three trial types visualized (right win-stay, right  
899 lose-stay and right lose-switch). To pool the single trial data from different sessions into  
900 pooled-population pseudo-trials, we contracted all trials to uniform length by binning the trial  
901 phases in scaled time (4 bins per phase, resulting in a total of 20 data points per trial). For  
902 every trial type, we then randomly sampled trials of that type from every neuron in every  
903 session, combining them into pseudo-trials of pooled-population activity. Trials were drawn  
904 without replacement; the total number of pseudo trials of a specific type was therefore  
905 determined by the minimum number of trials of that type performed in any session. We  
906 applied PCA to one pooled data set obtained in this way, treating the neurons as features to  
907 be reduced and the time points of the concatenated pseudo-trials as samples. We then  
908 plotted the average trial trajectory using the first 3 principal component scores (thick lines in  
909 2H). To evaluate the reproducibility of this approach, we resampled the pooled-population

910 data set several times, obtaining different subsets and combinations of single-trial data, and  
911 projected these pseudo-trials into the same PCA space (thin lines).  
912

913 Note that the random drawing of trials forced the neurons in the pseudo-session to be  
914 conditionally independent given the trial phase and type, and therefore effectively canceled  
915 out any principal components that were not aligned to our parameterization of the task. This  
916 was done on purpose to enhance the task-relevant structure in the neural activity and we  
917 term the principal components calculated this way “task-related principal components”.  
918

919 To test whether the activity in general was low-dimensional, we furthermore applied PCA  
920 directly to the deconvolved and z-scored traces of each session separately (Supplementary  
921 Figure S5B-D). Additionally, to estimate whether the activity was confined to a non-linear  
922 manifold, we calculated the *internal dimensionality* (Rubin et al., 2019): for a manifold of (non-  
923 linear) dimension  $d$ , we expect the average number of neighbours within a small L2-distance  
924  $r$  to be proportional to  $r^d$  (volume of a hypersphere). To estimate  $d$ , for each point in time in  
925 each session, we found the 500 other timepoints with most similar activity (L2 distance).  
926 Using these 500 points, we first discarded the 3 closest ones, and then linearly regressed the  
927 logarithm of the L2-distance to the logarithm of the number of points within that distance. We  
928 performed one such regression for each point in time (50ms) in each session. Our estimate  
929 of the dimensionality of the activity during a session was the averaged linear coefficients from  
930 all the regressions (Supplementary Figure S5E).

## 931 Visualization of trial heatmap

932 To create the trial heatmaps we first assigned a trial phase and a phase progress (0 to 1) to  
933 each calcium imaging frame. Next, we used these to calculate a pixel coordinate in the  
934 schematic (full image was 501×251 pixels). For the center port, the y-coordinate increased  
935 with increased phase progress, such that 0 was at the bottom and 1 was at the top of the  
936 rectangle. Two separate x-coordinates were used depending on the upcoming choice. For  
937 the side ports, the y-axis was reversed compared to the center port so that increasing phase  
938 progress was going downwards. The scaling was such that the beginning of the delay phase  
939 always was at the top and the end of the delay phase was at the indicated line. The reward  
940 and omission phases similarly progress downwards. The omission phase is usually shorter  
941 than the reward phase (i.e. the animal exits the port earlier), but scaled to have the same  
942 length in the visualization.  
943

944 For leftwards movements, i.e. center-to-left and right-to-center, the x-coordinate was linearly  
945 decreasing with phase progress. For rightward movements, i.e. center-to-right and left-to-  
946 center, it was linearly increasing with phase progress. The y-coordinate of the four  
947 movements was the square of the progress, followed by a translation and scaling. The phase  
948 progress therefore does not follow the tangent of the parabola between the respective ports  
949 but rather the x-coordinate.  
950

951 We then calculated the average deconvolved z-scored activity for each pixel and smoothed  
952 the averages with a gaussian kernel ( $\sigma = 7$  pixels). Finally, we applied the colormap to the  
953 smoothed value at each pixel. We set the color according to the mean activity and the  
954 transparency according to how many times the (smoothed) pixel was visited.

## 955 Calculation of neuron tuning scores

956 We created surrogate data by first dividing the session into blocks of consecutive left and  
957 right trials and then shuffling these blocks. This procedure meant most of the behavioral  
958 statistics of the session were preserved (number of left and right trials, stay and switch  
959 probabilities, time between trials and between phases within a trial, etc), while the connection  
960 to the neural activity was broken.

961  
962 To calculate the tuning score, we calculated the average z-scored fluorescence during each  
963 of the 12 trial phases. As a comparison, we did the same for 1000 iterations of blocks shuffled  
964 as described above. We classified a neuron as *positively tuned* to a trial phase if the average  
965 activity using the real data was larger than in 99.5% of the shuffled iterations or, reversely,  
966 as *negatively tuned* if it was less than 99.5% of the shuffled iterations. In addition to these  
967 discrete classifications, we also defined a *tuning score* as the real average minus the grand  
968 average of the shuffled iterations and divided by the standard deviation of the averages of  
969 the shuffled iterations. We call the 12 tuning scores for a given neuron the *tuning profile* of  
970 that neuron.

971  
972 For the open field, we used a similar procedure to define positively and negatively tuned  
973 neurons, as well as tuning scores, to the four behaviors. The shuffle was taken over the  
974 behavioral segments (left turn, right turn, running, stationary) without consideration of  
975 transition probabilities.

976  
977 To determine how well a neuron's activity discriminated win-stay from lose-switch trials in the  
978 choice task, we computed a *selectivity score* based on receiver operating characteristic  
979 (ROC) analysis. The selectivity score was defined as the area under the ROC curve (AUC),  
980 scaled from -1 to 1, i.e. equaled  $2 \times (\text{AUC} - 0.5)$ . To establish whether a neuron's selectivity  
981 score was statistically significant, we opted for a similar approach as described for the phase  
982 tuning scores above. For every neuron, we computed 1000 selectivity scores based on  
983 shuffled behavior data for comparison with the actual selectivity score. If the actual score was  
984 higher than 99.5% of the shuffled data scores, we classified the neuron as significantly win-  
985 stay tuned, if instead it was lower than 99.5% of the latter, we designated it significantly lose-  
986 switch tuned.

987  
988 To visualize any functional clustering of the tuning to the twelve phases, we stacked the 12-  
989 dimensional tuning profiles of all neurons from all pathways. We reduced the dimensionality  
990 to two using tSNE (perplexity 30; 10000 iterations; PCA initiation) (Supplementary Figure  
991 S5F). To quantify the clusteredness of the tuning profiles, we calculated the silhouette  
992 coefficient (Rousseeuw, 1987) assuming clustering by pathway (Supplementary Figure  
993 S5G), by the index of the strongest tuning (primary tuning; Supplementary Figure S5H), or  
994 by k-means clustering (Supplementary Figure S5I).

995  
996 To see how trial type (value) influenced the clusteredness of the tuning profiles, we calculated  
997 the mean activity for each neuron to each trial phase in each trial type ( $12 \times 3 = 36$  dimensions),  
998 and ran agglomerative clustering on this combined data (Supplementary Figure S5I).

## 999 Support vector machines to decode behavior from neuron activity

1000 We z-scored the deconvolved fluorescence traces for each neuron. Then, for every phase of  
1001 each individual trial, we calculated the average z-scored deconvolved fluorescence for all the  
1002 neurons. Using the trial phase as the label with the vector of average fluorescences as



1003 corresponding features, we trained support vector machines (SVMs) with linear kernels and  
1004 slack  $C=1$ . To handle multiclass labels (12 different trial phases), we employed the *one-*  
1005 *versus-one* strategy.

1006  
1007 In Figure 3J, we randomly selected a subset of neurons and randomly divided 80% of the  
1008 trial phases into a training set and 20% into a test set. We repeated this procedure 10 times  
1009 for each session and number of selected neurons (steps of 5 neurons) and reported the  
1010 average accuracy of these 10 iterations. Accuracy was measured as the fraction of trial  
1011 phases correctly predicted without accounting for the frequency of each label. Note that this  
1012 is not traditional 5-fold cross-validation because the train and test split (as well as the  
1013 selection of neurons) is redrawn in each iteration. In the open field (Figure 1O) we used a  
1014 similar procedure, but with segments of behavior rather than trial phases.

1015  
1016 In Figure 3K, we did five iterations of 80%-20% train-test splits for each session and used all  
1017 the available neurons in each iteration. We calculated the fraction of each phase type  
1018 correctly recalled for each session and averaged these values weighted by the number of  
1019 neurons in the respective session. In Figure 1P we used the same principle to calculate  
1020 confusion matrices.

1021  
1022 When decoding across days (Figure 4E) we only included matched neurons. For all pairs of  
1023 sessions from the same animal, we trained five iterations of support vector machines on 80%  
1024 of the trial phases from the session with the earliest recording date. We tested the SVM from  
1025 each iteration on the remaining 20% of the same session (*same-day-decoding*) as well as on  
1026 all the trial phases from the other session (*across-days-decoding*). We calculated the average  
1027 accuracy for each pair of sessions. In Figure 4E, each line corresponds to one such *pair*.  
1028 Note that this implies the same session is included multiple times. For each genotype and  
1029 bin of days, the thick lines indicate the average accuracy over all pairs, weighted by the  
1030 number of matched neurons.

1031  
1032 For decoding lose-switch versus win-stay, we averaged the deconvolved and z-scored traces  
1033 for each phase in each trial, as described above. We then discarded side-port phases and  
1034 analyzed the remaining six trial phases separately. For each type of trial phase, we discarded  
1035 all win-switch or lose-stay trials and trained separate SVMs to predict whether the individual  
1036 phases belonged to a win-stay or a lose-switch trial. Accuracies are reported as the fraction  
1037 of trial phases that were correctly predicted in a 5-fold cross-validation schema. For  
1038 comparison, for each decoding we also repeated the respective procedure with one instance  
1039 of shuffled data created with the same algorithm as when calculating the tuning scores. For  
1040 Figure 5O, we also compared each SVM trained on neural data to an SVM trained on a single  
1041 feature, namely the duration of the trial phase that is to be predicted. If the difference in neural  
1042 activity was only due to different vigor of the movements, these SVMs would reach the same  
1043 or better performance as the ones trained on neural data.

1044  
1045 To see how the SVM decoding varied with the action value, we took the SVMs trained on  
1046 lose-switch and win-stay trials applied them to all three types of trials. Note that these SVMs  
1047 never saw any lose-stay trials in the training phase and therefore can never predict lose-stay.  
1048 Instead of using the binary classification labels, we used the probability they assigned to win-stay  
1049 over lose-switch for each trial. In Fig. 5P, we binned trials by trial type and action value (quartile  
1050 bins) and showed the mean probability outputted by all SVMs for the respective bin. We also  
1051 correlated this probability (without binning) with the action value of each trial separately for  
1052 each trial type. For comparison, we calculated the same correlation on data where the action  
1053 value was either shifted forward or backward 10-30 trials (with wrap-around). This preserved  
1054 the trial-by-trial structure in the action value but dissociated it with the actual neural activity.

## 1055 QUANTIFICATION AND STATISTICAL ANALYSIS

1056 Statistically, this work was exploratory rather than confirmatory; there were no formal a-priori  
1057 hypotheses. Therefore, no statistical methods could be used to determine sample size. For  
1058 the same reason, we have also promoted descriptive over inferential statistics and in  
1059 particular refrained from reporting p-values between groups.

1060  
1061 All animals were recorded in multiple sessions. Unless stated otherwise, we did not match  
1062 ROIs across sessions, treating neural traces recorded in different sessions as originating  
1063 from independent units/neurons. Thus, in figures where the units of measure are neurons  
1064 (e.g. tuning distributions), the same neuron may be included multiple times. In figures where  
1065 the units of measure are sessions (e.g. decoding), we calculated averages weighing sessions  
1066 by the number of recorded neurons, thereby emphasizing sessions with many neurons over  
1067 those with few. We used the same weighing when bootstrapping SEMs. Supplementary  
1068 Tables S1-S3 show all the sessions included in the analysis, as well as the number of  
1069 detected neurons and performed trials.

## 1070 Analysis software

1071 In addition to the explicitly mentioned tools, we used Python 3.7, with numpy 1.17.3 (Walt et  
1072 al., 2011), scipy 1.3.0 (Virtanen et al., 2020), pandas 0.25.3 (McKinney, 2010) throughout.  
1073 The support vector machines and other machine learning tools were from scikit-learn 0.21.3  
1074 (Pedregosa et al., 2011). Some computationally heavy operations were implemented in  
1075 Cython (Behnel et al., 2011). Plots were rendered with the matplotlib 3.1.1 (Hunter, 2007),  
1076 seaborn 0.9.0 and figurefirst 0.0.6 (Lindsay et al., 2017) plotting libraries. Figures were edited  
1077 in Inkscape (0.92.4).

1078

1079

1080

1081

1082

1083

## 1084 Supplemental Video titles and legends

1085

1086 **Supplementary video 1.** Supplementary to Figure 1. Video shows two minutes of open  
1087 field behavior overlaid with DeepLabCut tracking markers and segmentation labels.

1088

1089 **Supplementary video 2.** Supplementary to Figure 3. Video illustrates phase tuning of the  
1090 example neurons.

1091

1092 **Supplementary video 3.** Supplementary to Figure 5. Video example showing phase-by-  
1093 phase, cross-validated SVM  
1094 predictions of trial phase and trial type.

1095

1096



1097

## RESOURCES TABLE

1098

| REAGENT or RESOURCE                           | SOURCE                                             | IDENTIFIER  |
|-----------------------------------------------|----------------------------------------------------|-------------|
| <b>Antibodies</b>                             |                                                    |             |
| Goat anti-GFP                                 | Abcam                                              | ab5450      |
| Rabbit anti-Tyrosine Hydroxylase              | Abcam                                              | ab112       |
| Donkey anti-rabbit Cy3                        | Jackson ImmunoResearch Laboratories                | 711-165-152 |
| Donkey anti-goat Alexa Fluor-488              | Jackson ImmunoResearch Laboratories                | 705-545-003 |
| <b>Bacterial and Virus Strains</b>            |                                                    |             |
| AAV5-CAG-Flex-GCaMP6s                         | Addgene                                            | 100842-AAV5 |
| <b>Experimental Models: Organisms/Strains</b> |                                                    |             |
| Mouse: D1-Cre (Drd1-cre EY262Gsat)            | Jackson Laboratories                               | EY262Gsat   |
| Mouse: A2A-Cre (Adora2a-cre KG139Gsat)        | Jackson Laboratories                               | KG139Gsat   |
| Mouse: Oprm1-Cre                              | Meletis Lab                                        | Oprm1-Cre   |
| <b>Software and Algorithms</b>                |                                                    |             |
| Python                                        | <a href="http://www.python.org">www.python.org</a> | 3.7         |
| Numpy                                         | (Walt et al., 2011)                                | 1.17.3      |
| Scipy                                         | (Virtanen et al., 2020)                            | 1.3.0       |
| Pandas                                        | (McKinney, 2010)                                   | 0.25.3      |
| Scikit-learn                                  | (Pedregosa et al., 2011)                           | 0.21.3      |
| Cython                                        | (Behnel et al., 2011)                              |             |
| Matplotlib                                    | (Hunter, 2007)                                     | 3.1.1       |

|                                   |                                                                    |        |
|-----------------------------------|--------------------------------------------------------------------|--------|
| Seaborn                           | <a href="http://www.seaborn.pydata.org">www.seaborn.pydata.org</a> | 0.9.0  |
| Statsmodels                       | (Seabold and Perktold, 2010)                                       |        |
| FigureFirst                       | (Lindsay et al., 2017)                                             | 0.0.6  |
| CalmAn                            | (Giovannucci et al., 2019)                                         | 1.4.2  |
| Inscopix Data Processing Software | Inscopix                                                           | 1.2.0  |
| Inkscape                          | <a href="http://www.inkscape.org">www.inkscape.org</a>             | 0.92.4 |
| Custom python and cython scripts  | This paper                                                         |        |

1099  
1100  
1101  
1102  
1103  
1104  
1105  
1106  
1107

1108

## 1109 REFERENCES

1110 Akhlaghpour, H., Wiskerke, J., Choi, J.Y., Taliaferro, J.P., Au, J., and Witten, I.B. (2016).  
1111 Dissociated sequential activity and stimulus encoding in the dorsomedial striatum during  
1112 spatial working memory. *ELife* 5, e19507.

1113 Albin, R.L., Young, A.B., and Penney, J.B. (1989). The functional anatomy of basal ganglia  
1114 disorders. *Trends Neurosci.* 12, 366–375.

1115 Alexander, G.E., and Crutcher, M.D. (1990). Functional architecture of basal ganglia circuits:  
1116 neural substrates of parallel processing. *Trends Neurosci.* 13, 266–271.

1117 Barto, A.G. (1995). Adaptive critics and the basal ganglia. In *Models of Information*  
1118 *Processing in the Basal Ganglia*, (Cambridge, MA, US: The MIT Press), pp. 215–232.

1119 Behnel, S., Bradshaw, R., Citro, C., Dalcin, L., Seljebotn, D.S., and Smith, K. (2011). Cython:  
1120 The Best of Both Worlds. *Comput. Sci. Eng.* 13, 31–39.

1121 Bloem, B., Huda, R., Sur, M., and Graybiel, A.M. (2017). Two-photon imaging in mice shows  
1122 striosomes and matrix have overlapping but differential reinforcement-related responses.  
1123 *ELife* 6, e32353.

1124 Cox, J., and Witten, I.B. (2019). Striatal circuits for reward learning and decision-making. *Nat.*  
1125 *Rev. Neurosci.* 20, 482–494.

1126 Cui, G., Jun, S.B., Jin, X., Pham, M.D., Vogel, S.S., Lovinger, D.M., and Costa, R.M. (2013).  
1127 Concurrent activation of striatal direct and indirect pathways during action initiation. *Nature*  
1128 494, 238–242.

1129 Doucet, A., and Johansen, A.M. (2011). A tutorial on particle filtering and smoothing: fifteen  
1130 years later.

1131 Doya, K. (1999). What are the computations of the cerebellum, the basal ganglia and the  
1132 cerebral cortex? *Neural Netw.* 12, 961–974.

1133 Friedman, A., Homma, D., Gibb, L.G., Amemori, K., Rubin, S.J., Hood, A.S., Riad, M.H., and  
1134 Graybiel, A.M. (2015). A Corticostriatal Path Targeting Striosomes Controls Decision-Making  
1135 under Conflict. *Cell* 161, 1320–1333.

1136 Fujiyama, F., Sohn, J., Nakano, T., Furuta, T., Nakamura, K.C., Matsuda, W., and Kaneko,  
1137 T. (2011). Exclusive and common targets of neostriatofugal projections of rat striosome  
1138 neurons: a single neuron-tracing study using a viral vector. *Eur. J. Neurosci.* 33, 668–677.

1139 Geddes, C.E., Li, H., and Jin, X. (2018). Optogenetic Editing Reveals the Hierarchical  
1140 Organization of Learned Action Sequences. *Cell* 174, 32-43.e15.

1141 Gerfen, C.R. (1989). The neostriatal mosaic: striatal patch-matrix organization is related to  
1142 cortical lamination. *Science* 246, 385–388.

1143 Gerfen, C.R., and Surmeier, D.J. (2011). Modulation of Striatal Projection Systems by  
1144 Dopamine. *Annu. Rev. Neurosci.* 34, 441–466.

- 1145 Gerfen, C.R., Engber, T.M., Mahan, L.C., Susel, Z., Chase, T.N., Monsma, F.J., and Sibley,  
1146 D.R. (1990). D1 and D2 dopamine receptor-regulated gene expression of striatonigral and  
1147 striatopallidal neurons. *Science* 250, 1429–1432.
- 1148 Giovannucci, A., Friedrich, J., Gunn, P., Kalfon, J., Brown, B.L., Koay, S.A., Taxidis, J., Najafi,  
1149 F., Gauthier, J.L., Zhou, P., et al. (2019). CalmAn an open source tool for scalable calcium  
1150 imaging data analysis. *ELife* 8, e38173.
- 1151 Gong, S., Zheng, C., Doughty, M.L., Losos, K., Didkovsky, N., Schambra, U.B., Nowak, N.J.,  
1152 Joyner, A., Leblanc, G., Hatten, M.E., et al. (2003). A gene expression atlas of the central  
1153 nervous system based on bacterial artificial chromosomes. *Nature* 425, 917–925.
- 1154 Graybiel, A.M. (1998). The basal ganglia and chunking of action repertoires. *Neurobiol.*  
1155 *Learn. Mem.* 70, 119–136.
- 1156 Graybiel, A.M., and Ragsdale, C.W. (1978). Histochemically distinct compartments in the  
1157 striatum of human, monkeys, and cat demonstrated by acetylthiocholinesterase staining.  
1158 *Proc. Natl. Acad. Sci.* 75, 5723–5726.
- 1159 Gurney, K., Prescott, T.J., and Redgrave, P. (2001). A computational model of action  
1160 selection in the basal ganglia. I. A new functional anatomy. *Biol. Cybern.* 84, 401–410.
- 1161 Hikosaka, O., Kim, H.F., Yasuda, M., and Yamamoto, S. (2014). Basal Ganglia Circuits for  
1162 Reward Value–Guided Behavior. *Annu. Rev. Neurosci.* 37, 289–306.
- 1163 Hinman, J.R., Chapman, G.W., and Hasselmo, M.E. (2019). Neuronal representation of  
1164 environmental boundaries in egocentric coordinates. *Nat. Commun.* 10.
- 1165 Hunter, J.D. (2007). Matplotlib: A 2D Graphics Environment. *Comput. Sci. Eng.* 9, 90–95.
- 1166 Hwang, E.J., Link, T.D., Hu, Y.Y., Lu, S., Wang, E.H.-J., Lilascharoen, V., Aronson, S., O’Neil,  
1167 K., Lim, B.K., and Komiyama, T. (2019). Corticostriatal Flow of Action Selection Bias. *Neuron*  
1168 104, 1126–1140.e6.
- 1169 Jiménez-Castellanos, J., and Graybiel, A.M. (1989). Compartmental origins of striatal efferent  
1170 projections in the cat. *Neuroscience* 32, 297–321.
- 1171 Jin, X., and Costa, R.M. (2010). Start/Stop Signals Emerge in Nigrostriatal Circuits during  
1172 Sequence Learning. *Nature* 466, 457–462.
- 1173 Klaus, A., Martins, G.J., Paixao, V.B., Zhou, P., Paninski, L., and Costa, R.M. (2017). The  
1174 Spatiotemporal Organization of the Striatum Encodes Action Space. *Neuron* 95, 1171–  
1175 1180.e7.
- 1176 Kravitz, A.V., Tye, L.D., and Kreitzer, A.C. (2012). Distinct roles for direct and indirect  
1177 pathway striatal neurons in reinforcement. *Nat. Neurosci.* 15, 816–818.
- 1178 Kreitzer, A.C. (2009). Physiology and pharmacology of striatal neurons. *Annu. Rev. Neurosci.*  
1179 32, 127–147.
- 1180 Lau, B., and Glimcher, P.W. (2008). Value representations in the primate striatum during  
1181 matching behavior. *Neuron* 58, 451–463.

- 1182 Lei, W., Jiao, Y., Mar, N.D., and Reiner, A. (2004). Evidence for Differential Cortical Input to  
1183 Direct Pathway versus Indirect Pathway Striatal Projection Neurons in Rats. *J. Neurosci.* *24*,  
1184 8289–8299.
- 1185 Lindsay, T., Weir, P., and van Breugel, F. (2017). FigureFirst: A Layout-first Approach for  
1186 Scientific Figures. In Proceedings of the 16th Python in Science Conference, (Austin, Texas:  
1187 SciPy), pp. 57–63.
- 1188 Märtin, A., Calvigioni, D., Tzortzi, O., Fuzik, J., Wörnberg, E., and Meletis, K. (2019). A  
1189 Spatiomolecular Map of the Striatum. *Cell Rep.* *29*, 4320-4333.e5.
- 1190 Mathis, A., Mamidanna, P., Cury, K.M., Abe, T., Murthy, V.N., Mathis, M.W., and Bethge, M.  
1191 (2018). DeepLabCut: markerless pose estimation of user-defined body parts with deep  
1192 learning. *Nat. Neurosci.* *21*, 1281–1289.
- 1193 McKinney, W. (2010). Data Structures for Statistical Computing in Python. In Proceedings of  
1194 the 9th Python in Science Conference, S. van der Walt, and J. Millman, eds. pp. 51–56.
- 1195 van der Meer, M.A.A., Johnson, A., Schmitzer-Torbert, N.C., and Redish, A.D. (2010). Triple  
1196 Dissociation of Information Processing in Dorsal Striatum, Ventral Striatum, and  
1197 Hippocampus on a Learned Spatial Decision Task. *Neuron* *67*, 25–32.
- 1198 Mello, G.B.M., Soares, S., and Paton, J.J. (2015). A Scalable Population Code for Time in  
1199 the Striatum. *Curr. Biol.* *25*, 1113–1122.
- 1200 Mnih, V., Badia, A.P., Mirza, M., Graves, A., Harley, T., Lillicrap, T.P., Silver, D., and  
1201 Kavukcuoglu, K. (2016). Asynchronous methods for deep reinforcement learning. In  
1202 Proceedings of the 33rd International Conference on International Conference on Machine  
1203 Learning - Volume 48, (New York, NY, USA: JMLR.org), pp. 1928–1937.
- 1204 Musall, S., Kaufman, M.T., Juavinett, A.L., Gluf, S., and Churchland, A.K. (2019). Single-trial  
1205 neural dynamics are dominated by richly varied movements. *Nat. Neurosci.* *22*, 1677–1686.
- 1206 Nelson, A.B., and Kreitzer, A.C. (2014). Reassessing Models of Basal Ganglia Function and  
1207 Dysfunction. *Annu. Rev. Neurosci.* *37*, 117–135.
- 1208 Olson, L., Seiger, Å., and Fuxe, K. (1972). Heterogeneity of striatal and limbic dopamine  
1209 innervation: Highly fluorescent islands in developing and adult rats. *Brain Res.* *44*, 283–288.
- 1210 Padoa-Schioppa, C., and Assad, J.A. (2006). Neurons in the orbitofrontal cortex encode  
1211 economic value. *Nature* *441*, 223–226.
- 1212 Parker, J.G., Marshall, J.D., Ahanonu, B., Wu, Y.-W., Kim, T.H., Grewe, B.F., Zhang, Y., Li,  
1213 J.Z., Ding, J.B., Ehlers, M.D., et al. (2018). Diametric neural ensemble dynamics in  
1214 parkinsonian and dyskinetic states. *Nature* *557*, 177–182.
- 1215 Pedregosa, F., Varoquaux, G., Gramfort, A., Michel, V., Thirion, B., Grisel, O., Blondel, M.,  
1216 Prettenhofer, P., Weiss, R., Dubourg, V., et al. (2011). Scikit-learn: Machine Learning in  
1217 Python. *J. Mach. Learn. Res.* *12*, 2825–2830.
- 1218 Pert, C.B., Kuhar, M.J., and Snyder, S.H. (1976). Opiate receptor: autoradiographic  
1219 localization in rat brain. *Proc. Natl. Acad. Sci. U. S. A.* *73*, 3729–3733.

- 1220 Peters, A.J., Steinmetz, N.A., Harris, K.D., and Carandini, M. (2019). Striatal activity reflects  
1221 cortical activity patterns. *BioRxiv* 703710.
- 1222 Reig, R., and Silberberg, G. (2014). Multisensory Integration in the Mouse Striatum. *Neuron*  
1223 83, 1200–1212.
- 1224 Rousseeuw, P.J. (1987). Silhouettes: A graphical aid to the interpretation and validation of  
1225 cluster analysis. *J. Comput. Appl. Math.* 20, 53–65.
- 1226 Rubin, A., Sheintuch, L., Brande-Eilat, N., Pinchasof, O., Rechavi, Y., Geva, N., and Ziv, Y.  
1227 (2019). Revealing neural correlates of behavior without behavioral measurements. *Nat.*  
1228 *Commun.* 10, 4745.
- 1229 Sales-Carbonell, C., Taouali, W., Khalki, L., Pasquet, M.O., Petit, L.F., Moreau, T., Rueda-  
1230 Orozco, P.E., and Robbe, D. (2018). No Discrete Start/Stop Signals in the Dorsal Striatum of  
1231 Mice Performing a Learned Action. *Curr. Biol.* 28, 3044-3055.e5.
- 1232 Samejima, K., Ueda, Y., Doya, K., and Kimura, M. (2005). Representation of Action-Specific  
1233 Reward Values in the Striatum. *Science* 310, 1337–1340.
- 1234 Seabold, S., and Perktold, J. (2010). *Statsmodels: Econometric and Statistical Modeling with*  
1235 *Python.* (Austin, Texas), pp. 92–96.
- 1236 Shin, J.H., Kim, D., and Jung, M.W. (2018). Differential coding of reward and movement  
1237 information in the dorsomedial striatal direct and indirect pathways. *Nat. Commun.* 9, 1–14.
- 1238 Smith, J.B., Klug, J.R., Ross, D.L., Howard, C.D., Hollon, N.G., Ko, V.I., Hoffman, H.,  
1239 Callaway, E.M., Gerfen, C.R., and Jin, X. (2016). Genetic-Based Dissection Unveils the  
1240 Inputs and Outputs of Striatal Patch and Matrix Compartments. *Neuron* 91, 1069–1084.
- 1241 Stalnaker, T.A., Calhoun, G.G., Ogawa, M., Roesch, M.R., and Schoenbaum, G. (2010).  
1242 Neural correlates of stimulus-response and response-outcome associations in dorsolateral  
1243 versus dorsomedial striatum. *Front. Integr. Neurosci.* 4.
- 1244 Steinmetz, N.A., Zatzka-Haas, P., Carandini, M., and Harris, K.D. (2019). Distributed coding  
1245 of choice, action and engagement across the mouse brain. *Nature* 576, 266–273.
- 1246 Stringer, C., Pachitariu, M., Steinmetz, N., Reddy, C.B., Carandini, M., and Harris, K.D.  
1247 (2019). Spontaneous behaviors drive multidimensional, brainwide activity. *Science* 364.
- 1248 Tai, L.-H., Lee, A.M., Benavidez, N., Bonci, A., and Wilbrecht, L. (2012). Transient stimulation  
1249 of distinct subpopulations of striatal neurons mimics changes in action value. *Nat. Neurosci.*  
1250 15, 1281–1289.
- 1251 Tecuapetla, F., Jin, X., Lima, S.Q., and Costa, R.M. (2016). Complementary Contributions of  
1252 Striatal Projection Pathways to Action Initiation and Execution. *Cell* 166, 703–715.
- 1253 Tepper, J.M., Abercrombie, E.D., and Bolam, J.P. (2007). Basal ganglia macrocircuits. In  
1254 *Progress in Brain Research*, J.M. Tepper, E.D. Abercrombie, and J.P. Bolam, eds. (Elsevier),  
1255 pp. 3–7.

- 1256 Virtanen, P., Gommers, R., Oliphant, T.E., Haberland, M., Reddy, T., Cournapeau, D.,  
1257 Burovski, E., Peterson, P., Weckesser, W., Bright, J., et al. (2020). SciPy 1.0: fundamental  
1258 algorithms for scientific computing in Python. *Nat. Methods* 17, 261–272.
- 1259 Wall, N.R., De La Parra, M., Callaway, E.M., and Kreitzer, A.C. (2013). Differential innervation  
1260 of direct- and indirect-pathway striatal projection neurons. *Neuron* 79, 347–360.
- 1261 Walt, S. van der, Colbert, S.C., and Varoquaux, G. (2011). The NumPy Array: A Structure for  
1262 Efficient Numerical Computation. *Comput. Sci. Eng.* 13, 22–30.
- 1263 Wang, A.Y., Miura, K., and Uchida, N. (2013). The dorsomedial striatum encodes net  
1264 expected return, critical for energizing performance vigor. *Nat. Neurosci.* 16, 639–647.
- 1265 White, N.M., and Hiroi, N. (1998). Preferential localization of self-stimulation sites in  
1266 striosomes/patches in the rat striatum. *Proc. Natl. Acad. Sci.* 95, 6486–6491.
- 1267 Yoshizawa, T., Ito, M., and Doya, K. (2018). Reward-Predictive Neural Activities in Striatal  
1268 Striosome Compartments. *ENeuro* 5.
- 1269 Zheng, T., and Wilson, C.J. (2002). Corticostriatal Combinatorics: The Implications of  
1270 Corticostriatal Axonal Arborizations. *J. Neurophysiol.* 87, 1007–1017.
- 1271 Zhou, P., Resendez, S.L., Rodriguez-Romaguera, J., Jimenez, J.C., Neufeld, S.Q.,  
1272 Giovannucci, A., Friedrich, J., Pnevmatikakis, E.A., Stuber, G.D., Hen, R., et al. (2018).  
1273 Efficient and accurate extraction of in vivo calcium signals from microendoscopic video data.  
1274 *ELife* 7, e28728.
- 1275
